# Genome-wide analysis of H3K4me3 and H3K27me3

modifications throughout the mouse urogenital ridge at E11.5.

Yisheng Yang and Megan J Wilson\*.

Developmental Biology and Genomics Laboratory, Department of Anatomy, School of  
Biomedical Sciences, University of Otago, P.O. Box 56, Dunedin 9054, New Zealand

\*Corresponding author

Email: [meganj.wilson@otago.ac.nz](mailto:meganj.wilson@otago.ac.nz). Ph. +64 3 470 4695, Fax: +64 479 7254

**Abstract**

25  
26  
27  
28  
29  
30  
31  
32  
33  
34  
35  
36  
37  
38  
39  
40  
41  
42  
43  
44  
45  
46  
47

In mammals, the adrenal gland, testis and ovary arise from a common progenitor tissue known as the urogenital ridge (UGR). This small population of cells will adopt a number of different cell fates following sex determination, including forming the precursors of somatic cells (such as Sertoli and granulosa cells) and steroidogenic cells. In addition, this tissues also contains the Wolffian and Müllerian ducts that later form components of the reproductive tracts. A potential mechanism to maintain developmental plasticity of the UGR until gonad formation is through the epigenetic modification of histone proteins.

In order to provide a resource for future studies, we used chromatin immunoprecipitation followed by high throughput sequencing (ChIP-seq) for two histone modifications, H3K4me3 and H3K27me3, in the E11.5 mouse UGR. These marks are both known to reflect the active, repressive or a poised chromatin state. We found that enrichment for each histone mark reflected transcriptional activity in precursor cells of the developing gonad. From the analysis of potential enhancer/regulator peak regions for DNA binding motifs, we identified several candidate transcription factors that may contribute to gonadal cell lineage specification. We additionally identified signaling pathway genes that are targeted by both chromatin modifications. Together, these datasets provide a useful resource for investigating gene regulatory networks functioning during UGR development at E11.5.

Keywords: epigenetics, histone, gonad, urogenital ridge, cell fate

## 48 **Introduction**

49

50 The mammalian urogenital ridge (UGR) is a unique developmental structure that has the  
 51 ability to adopt two quite distinct fates during late embryonic development. Each bi-potential  
 52 UGR consists of the progenitor cells required to form either a testis or ovary: the supporting  
 53 cells (Sertoli or granulosa cells), the germ cells (GCs), the interstitial cells (including  
 54 steroidogenic cells) and endothelial cells (Capel, 2017). Cell lineage RNA analysis (Jameson et  
 55 al., 2012) has suggested that the gonadal progenitor cells are biased towards one of two cell  
 56 fates: germ cells are considered male-biased, whereas supporting cells are female-biased. The  
 57 supporting cells adopt a sex-specific fate first, and this process is completed by embryonic day  
 58 12.5 (E12.5) in mice. The germ and interstitial cells follow, starting at E12.5 (Jameson et al.,  
 59 2012). How cell fate plasticity is maintained within the developing UGR prior to and during  
 60 early sex determination is unknown.

61

62 Sex determination in mammals is a critical step in specification of gonadal cell fate and  
 63 depends on the chromosomal makeup of the embryo. The presence of a Y chromosome (XY  
 64 genotype) shifts the bi-potential UGR towards a testicular fate, through the initial expression  
 65 of the testis determining gene, *Sex determining region Y* (*Sry*). *Sry* in turn activates *Sry-box 9*  
 66 (*Sox9*) gene expression required for Sertoli cell differentiation and the activation of signaling  
 67 pathways for the maturation of testis-specific cell types (Sekido and Lovell-Badge, 2008;  
 68 Wilhelm et al., 2007; Wilson et al., 2005). SOX9 up-regulates *Anti-Müllerian hormone* (*AMH*) to  
 69 promote the regression of the Müllerian ducts, whereas the Wolffian ducts develop into male-  
 70 specific structures under the influence of testosterone, produced by the Leydig cells  
 71 (Munsterberg and Lovell-Badge, 1991; Wilhelm et al., 2006).

72

73 In the absence of a Y chromosome (XX genotype), the female developmental pathway is  
 74 initiated. Unlike male development, the morphology of the gonad does not change drastically  
 75 in the immediate period after initiation of the female pathway (Mork et al., 2012). Pre-  
 76 granulosa cell specification occurs at ~E12.5 accompanied by expression of *Forkhead box L2*  
 77 (*Foxl2*) (Schmidt et al., 2004). *Sox9* gene expression is repressed in the XX gonad by ovary-  
 78 specific Wnt4/ $\beta$ -catenin/Rspo1 signaling pathway that promotes the expression of *Foxl2* and  
 79 the differentiation of the Müllerian ducts into female-specific structures (Chassot et al., 2008;  
 80 Pannetier et al., 2016; Tanaka and Nishinakamura, 2014). The primordial GCs arise near the  
 81 yolk sac and migrate into the UGR, arriving at ~E10.5 (Molyneaux et al., 2001). GCs located in  
 82 the developing ovary enter meiosis due to the presence of retinoic acid (RA) produced from  
 83 the neighboring mesonephros. In contrast, male germ cells are prevented from beginning  
 84 meiosis, as RA is degraded in the developing testis by the CYP26B1 enzyme (Bowles et al.,  
 85 2006; Spiller et al., 2017).

86

87 Due to the bi-potential nature of the UGR, in some disorders of sex development (DSD) an  
 88 ovotestis may result, a mix of both male and female associated cell types located within a  
 89 single adult gonad. This disorders are often a result of mutations in the *SRY* or *SOX9* genes  
 90 (Vilain, 2011). Conditional knockout of *Foxl2* in the adult ovary results in the formation of  
 91 Sertoli- and Leydig-like cells, suggesting a role for *Foxl2* in maintaining the ovarian phenotype  
 92 in the adult as well as the embryo (Uhlenhaut et al., 2009). Likewise, inactivation of *DMRT1* in  
 93 adult Sertoli cells increases *Foxl2* gene expression, producing granulosa and theca-like cells,  
 94 along with the production of estrogen (Matson et al., 2011). Together, these studies  
 95 demonstrate the incredible plasticity of sex-development and the need to continually  
 96 maintain one pathway (either male or female) over the other throughout the adult lifetime.



97

98 One possible mechanism to regulate and maintain gonadal cell fate is through the use of  
 99 specific histone modifications. Global genome-wide changes to histone modifications could  
 100 also be involved in initiating differentiation of precursor cells within the gonad and  
 101 mesonephros. Epigenetic modifications play key roles in cell lineage specification during  
 102 development by manipulating chromatin structure and altering gene expression (Atasi and  
 103 Stunnenberg, 2017). Chromatin is found in two states: euchromatin, an open, unwound  
 104 formation that allows for an active state of transcription, and heterochromatin, a closed,  
 105 tightly wound formation that represses transcription (Parker et al., 2004). Post-translational  
 106 modifications to histone proteins largely occur to amino acids located at the N-terminal tail,  
 107 influencing DNA accessibility to transcriptional regulators of gene expression. Trimethylation  
 108 of lysine N-terminal residues can induce either an active or repressed chromatin  
 109 configuration depending on location. Histone 3 lysine 4 trimethylation (H3K4me3) is a  
 110 hallmark of actively transcribed genes and is commonly associated with transcription start  
 111 sites (TSS) and promoter regions, whereas histone 3 lysine 27 trimethylation (H3K27me3) is  
 112 strongly associated with inactive promoter regions and repressed gene transcription  
 113 (Bannister and Kouzarides, 2011). Both active and repressive marks can be present at the  
 114 same genomic regions, indicating a poised state common in undifferentiated cells such as  
 115 embryonic stem cells (Bernstein et al., 2006; Voigt et al., 2013).

116

117 There is limited data regarding the epigenetic profile of gonadal somatic and germ cells *in*  
 118 *vivo*. Using cell sorting, researchers have isolated the primordial GCs (PGCs) using Oct4-GFP  
 119 mouse line (Ng et al., 2013; Sachs et al., 2013) to study epigenetic modifications using  
 120 chromatin immunoprecipitation followed by sequencing (ChIP-seq). PGCs tend to have high  
 121 levels of the repressive H3K27me3 mark and are transcriptionally silent (Ng et al., 2013;

122 Sachs et al., 2013). Bivalent regions, areas with both active and repressive histone  
123 modifications, are enriched within PGCs and tend to be located near developmental genes  
124 (Sachs et al., 2013). Recently, DNaseI-seq and ChIP-seq for H3K27ac was used to identify  
125 active enhancer elements in Sertoli cells at E15.5 (Maatouk et al., 2017).

126

127 To obtain a more global view of histone modifications in all cells of the developing bi-  
128 potential gonad, we used ChIP-seq to study the distribution of H3K27me3 and H3K4me3 in  
129 E11.5 gonads. Profiling of histone modifications not only gives information about the  
130 transcriptional activity of nearby genes, but can aid in the identification of tissue-specific  
131 enhancer elements. Through ChIP-seq, we discovered different histone signal profiles that  
132 reflect gene expression levels in the E11.5 gonad. Using this data, we identified  
133 overrepresented DNA binding motifs to determine candidate transcription factors, and then  
134 extracted their cell-type expression values during gonad development using publically  
135 available data (Jameson et al., 2012). This data set provides a resource for future studies of  
136 early gonadal development.

137

## 138 **Results**

139

### 140 *Immunostaining of UGR at E11.5*

141

142 Sectioned E11.5 embryos were stained for H3K4me3 and H3K27me3 histone marks (Fig. 1).  
143 While all cells were positive for some level of these histone modifications, there were many  
144 cells located within the gonad that stained much more strongly than nearby cells (Fig. 1).  
145 These strongly-staining cells were located along the coelomic epithelium and scattered

146 throughout the gonad (Fig. 1A). While some of these cells are likely to be primordial GCs,  
147 many of these cells are also somatic cells. For instance, cells that line the coelomic epithelium  
148 are precursors of supporting cell lineages such as Sertoli cells (Karl and Capel, 1998). Staining  
149 for each histone modification was found in the nucleus, often co-localized at nuclear foci (Fig.  
150 1B).

151

## 152 *Genome-wide identification of H3K27me3 and H3K4me3*

153 Urogenital ridge tissue was dissected from each E11.5 stage embryo and pooled (two  
154 biological replicates, five litters per replicate), prior to cross-linking briefly with  
155 formaldehyde. Extracted chromatin was fragmented by MNase digestion, followed by  
156 immunoprecipitation using antibodies for either H3K27me3 or H3K4me3. Two biological  
157 replicates (from separate ChIP experiments) were sequenced on an Illumina platform to  
158 detect each histone mark (our approach is summarized in Fig. 2A). Sequencing reads were  
159 aligned to the mouse reference genome (mm9, File 1) and correlation analysis revealed good  
160 reproducibility between each biological replicate (>93% Pearson correlation, Fig. S1). For  
161 global signal distribution analysis, both replicates were pooled.

162

163 We used MACS broad peak caller (bdgbroadcall) to call peak regions, genomic regions with  
164 statistically enriched signal compared to the input controls. This identified 32,182 peak  
165 regions for H3K4me3 (with an average peak length of 1809 bp) and 13,556 regions for  
166 H3K27me3 (with an average length of 1310 bp). Peak location, with respect to gene body  
167 features, was analyzed with HOMER (Heinz et al., 2010) and CEAS (Shin et al., 2009) for each  
168 histone mark. Of the MACS broadcall regions, 19476 (H3K4me3) and 7527 (H3K27me3)  
169 peaks were located near known RefSeq genes. H3K4me3 was more enriched at the 5' end of  
170 genes, near the transcriptional start site (TSS) (Fig. 2B and Fig. S2) including CpG islands (Fig

171 2C). The repressive histone mark, H3K27me3 was more generally enriched for within  
 172 intergenic regions and introns, and a smaller proportion of peaks were located within  
 173 promoter regions (Fig. 2B and 2C, Fig. S2). This data is consistent with previous studies,  
 174 showing that H3K4me3 is found at active promoter regions and enhancers (Santos-Rosa et al.,  
 175 2002), whereas the H3K27me3 mark is largely distributed across the bodies of genes, with  
 176 some limited enrichment near the TSS, often at bivalently marked genes (Young et al., 2011).

177

178 The distribution of histone marks at five key sex-determining genes was examined further  
 179 (Fig 3. and Fig. S3). Active histone modification enrichment near promoter regions, and  
 180 within either an intron or nearby intergenic regions, can indicate the presence of an enhancer  
 181 region (Atlasi and Stunnenberg, 2017). *Sox9*, *Wt1* and *Sf1* genes are all expressed in the  
 182 developing UGR at E11.5 and, following sex-determination, play important roles in testicular  
 183 development (Hammes et al., 2001; Kent et al., 1996; Luo et al., 1994). *Lhx9* and *Cbx2* are  
 184 required for formation of the mouse gonad primordium (Birk et al., 2000; Katoh-Fukui et al.,  
 185 2005). The *Sf1* (also known as *Nr5a1*) gene showed enrichment for both histone marks, peak  
 186 regions were located within the 4<sup>th</sup> intron and near the promoter region of the gene (Fig. 3A).  
 187 H3K4me3 signal was strongly enriched for around the promoter region and first exons for  
 188 *Wt1* and *Wt1os* genes (Fig. 3B). *Wt1os* encodes a long non-coding RNA, co-expressed with  
 189 *Wt1* in many tissues (Dalloso et al., 2007). A narrow peak region for H3K27me3 signal,  
 190 overlapping with H3K3me4 signal, was also identified in the 2<sup>nd</sup> intron (Fig. 3B). An additional  
 191 H3K4me3 peak region is located ~3 kb, 3' of the *Wt1* gene (Fig. 3B); this may represent an  
 192 active enhancer element.

193

194 *Sox9* is a key male sex-determination gene and target of *Sry* (Kent et al., 1996; Sekido and  
 195 Lovell-Badge, 2008). The H3K4me3 modification was strongly enriched around the *Sox9* gene

(Fig. 3C), reflecting the fact that this gene is expressed in both sexes at E11.5 (Kent et al., 1996). There was an additional peak for H3K27me3, located 8.4 kb upstream of the *Sox9* promoter. This genomic region is ~3.5 kbp away from the TESCO (testis-specific enhancer of *Sox9* core element) enhancer, thought to restrict *Sox9* expression to the testis (Bernard et al., 2012; Gonen et al., 2017; Sekido and Lovell-Badge, 2008).

*Lhx9* and *Cbx2* (also known as *M33*) genes are required for formation of the UGR and are expressed at E11.5 (Birk et al., 2000; Katoh-Fukui et al., 2005). H3K4me3 signal was high around the TSS for both genes (Fig. S3), indicating active promoter regions. There was also a peak for *2310009B15Rik*, a protein-coding gene of unknown function located near the *Lhx9* gene, suggesting that this gene is also expressed at E11.5. Signal for the repressive histone mark H3K27me3 was also found near the *Lhx9* TSS and throughout the gene body (Fig. S3A), indicating that in some gonadal cells *Lhx9* is repressed. Previous spatial expression studies have shown that *Lhx9* mRNA is strongest in the cells of the coelomic epithelium, and absent from some of the cells of the inner mesenchyme and mesonephros (Birk et al., 2000). In contrast, H3K27me3 ChIP-seq signal was low around the *Cbx2* gene, with no peak regions being identified by MACS (Fig. S3B), indicating little repression by H3K27me3 modification in the UGR cell population. *Cbx2* exhibits broader cell expression, being found in all cells of the gonad and the neighboring mesonephros (Katoh-Fukui et al., 2012).

*Levels of H3K4me3 and H3K27me3 modifications reflect gene expression levels in the UGR.*

To identify genes with similar histone mark profiles, heatmaps with K-means clustering were generated using deepTools (Ramirez et al., 2014) to visualize the region around the TSS for RefSeq gene annotations and separate them into clusters with similar signal profiles (Fig. 4A

221 and 5A, File 2). Gene ontology (GO) analysis was carried out for clustered genes using  
 222 PANTHER to identify overrepresented biological annotations (Fig. 4B and 4C, Fig. 5B and 5C,  
 223 Files 3 and 4). The expression levels of genes grouped within each signal profile cluster was  
 224 also extracted from Affymetrix expression data previously generated for each cell lineage  
 225 present in the E11.5 gonad by Jameson *et al.* (Jameson et al., 2012). This enabled us to  
 226 determine the relationship between signal clusters and gene expression levels (Fig. 6).

227

228 Three clusters were generated for H3K4me3 signal distribution. The first cluster had high  
 229 levels of H3K4me3 located near the gene body and TSS (Fig. 4A). Cluster 1 genes function in  
 230 core cellular biological processes including general essential cellular processes such as RNA  
 231 processing and metabolism (Fig. 4B). The second cluster (cluster 2) genomic regions have  
 232 moderate levels of H3K4me3 signal (Fig. 4A), and are enriched for genes involved largely in  
 233 sensory reception and receptor signaling genes (Fig. 4C). There are no significant differences  
 234 in gene expression levels between cluster 1 and 2 genes (Fig. 6B). However, cluster 3 genes  
 235 are expressed at significantly lower levels compared to cluster 1 and 2 genes (Fig. 5, two-way  
 236 ANOVA,  $P < 0.0001$ ). Genomic regions grouped into the third cluster have little low/no  
 237 H3K4me3 signal (Fig. 4A). Out of 13,043 genes (18,043 RefSeq transcripts) associated within  
 238 cluster 3 regions, only 3,392 genes are noted as expressed in the E11.5 gonad Affymetrix  
 239 dataset (Jameson et al., 2012) (26% of genes, File 3). These genes function in a variety of  
 240 different biological processes (Fig. S4A). In comparison, of the 6166 genes in cluster 1  
 241 (corresponding to 7005 RefSeq transcripts), 5056 of these are expressed in the E11.5 gonad  
 242 (~82% of genes, File 3). This supports previous research showing that H3 genome-wide  
 243 enrichment is linked to gene expression (Guenther et al., 2007; Mikkelsen et al., 2007).

244

H3K27me3 signal distribution can be divided into 5 clusters with different profiles. Cluster 1 histone mark covers over 20 kbp of DNA including the gene TSS (Fig. 5A), and is likely to represent areas of repressed chromatin. GO annotation revealed that these genome regions are enriched for genes that function in essential early developmental processes such as germ layer development and axis specification (Fig. 5B). Of these 219 cluster 1 genes, only 58 had detectable expression in single cell profiling (File 4), with expression levels much lower than genes found in other H3K27me3 signal profile clusters (Fig. 5A). The signal profile for cluster 2 genes is strongest around a +/- 5 kb region near the TSS. GO analysis revealed that many cluster 2 genes function in cell-cell signaling, differentiation and transcriptional regulation (Fig. 5C). This signal cluster is associated with 1559 genes (1750 RefSeq transcripts) and 33% of these genes (518 genes) are expressed in the gonad at E11.5 (File 4). As the H3K27me3 mark is associated with gene repression, we would expect expression of genes with high H3K27me3 signal, such as those genes associated with clusters 1 and 2, to be low or not detectable.

Cluster 3 had reduced levels of signal near the TSS compared to nearby regions (Fig. 5A, see enlarged view in Fig. S4B). These genes function in essential biological processes such as metabolism and sub-cellular organization (Fig 5C). Of 3844 genes with this signal profile, 56% (3138 genes) are expressed in the gonad at E11.5 (File 4). H3K27me3 signal profile for cluster 4 is confined to narrow region near the TSS (Fig. 5A). Cluster 4 associated genes are involved in the intracellular signaling including localization and transport of proteins (Fig. S5). Of the 5294 genes associated with this cluster, 2,878 are expressed in the early gonad (File 4). Cluster 5 gene regions had no enrichment for H3K27me3 signal, and this was the largest group of genes (17219 genes corresponding to 22163 RefSeq transcripts). Approximately 54% of these genes are expressed at E11.5 (9,447 genes, File 4). When comparing normalized

270 gene expression levels between grouped genes, cluster 3-5 genes are expressed at levels  
271 significantly higher than cluster 1 and 2 genes (Fig. 6C,  $P < 0.0001$ ).

272

### 273 ***Genomic regions common to both data sets***

274

275 To identify regions of enrichment common to both histone marks, peak regions generated by  
276 MACS**broadpeakcall** for each mark were intersected based on at least 1bp overlap, to produce  
277 a list of 12,296 regions (Fig. 7A). Examples of signal distribution for two genes of interest,  
278 *Fgf9* and *Esr1*, is shown in Fig. 7C and D, with genome regions common to both marks  
279 indicated. These common peak regions were used with GREAT (McLean et al., 2010) to  
280 identify genes nearby each genomic region (File 6). These genes may lie in regions of the  
281 genome that is being actively transcribed, or either repressed or poised for future activation  
282 due to the presence of H3K27me3 in addition to H3K4me3.

283

284 The resulting gene list (6523 genes) was used for GO functional annotation in PANTHER (Mi  
285 et al., 2010) (Fig. 7B and File 6). PANTHER pathway analysis showed that Wnt, Fgf and Tgfβ  
286 signaling pathways were significantly overrepresented (Fig. 7B), pathways that have  
287 previously been shown to be essential for early gonad development (Colvin et al., 2001;  
288 Gustin et al., 2016; Josso and di Clemente, 1999; Kim et al., 2006). In particular, Wnt signaling  
289 pathway associated genes (123 genes) were particularly enriched within this list (Fig. 7B).  
290 Other pathways of interest included angiogenesis, important for formation of the gonadal  
291 blood supply and patterning of the testicular cords during development (Combes et al., 2009;  
292 Coveney et al., 2008). Integrin signaling is also required for correct development of the gonad  
293 and their primordial germ colonization (Anderson et al., 1999; Messina et al., 2011).

294



295 Genes linked to pathways with unknown roles in gonad development were also  
 296 overrepresented. Gonadotrophin-releasing hormone (GnRH) signaling has been best studied  
 297 in the adult mouse, where GnRH neuronal signaling peptide loss of function leads to  
 298 hypogonadism in adult mice. GnRH neuronal signaling does not appear to be functional until  
 299 after E16.5 (Wen et al., 2010). The *GnRH receptor (GnrhR)* gene is expressed in the rat  
 300 embryonic testis Leydig cells, adult ovary and breast tissues (Ishaq et al., 2013; Schang et al.,  
 301 2012) but has not been reported to have significant expression in the developing embryo  
 302 gonad and was included in the array RNA expression data (Jameson et al., 2012). However,  
 303 the gene for the *Gnrh1* hormone is expressed in developing chick gonad (Carre et al., 2011)  
 304 and mouse gonad (Fig. S6, (Jameson et al., 2012)).

305

306 Several genes linked to glutamate-receptor signaling pathways were also overrepresented on  
 307 the resulting gene list. These genes are expressed in many non-neural tissues including the  
 308 adult testis (Julio-Pieper et al., 2011; Marciniak et al., 2016), the developing gonad (Jameson  
 309 et al., 2012) and are believed to contribute to organ homeostasis. Cholecystokinin receptor  
 310 (CCKR) pathway components are also overrepresented. While cholecystokinin (a peptide  
 311 hormone) itself is not expressed in the gonad or has any known function in gonad  
 312 development, many CCKR downstream pathway genes such as  $\beta$ -catenin, *Jun* and c-Myc are  
 313 known developmental regulators and are expressed in the developing gonad (Jameson et al.,  
 314 2012). This may be why this pathway is significantly overrepresented. The CCKR pathway has  
 315 also been linked to sex dimorphic responses in the brain (Xu et al., 2012).

316

### 317 ***DNA sequences associated with H3K4me3 enrichment***

318 To identify candidate factors that might bind to enhancers associated with each histone mark,  
 319 we used HOMER motif analysis. Narrow peak regions (~1kb) were first identified, as these

are more likely to represent a regulatory element rather than global repression/activation of an area of the genome (Fig. 9A). This was followed by HOMER motif enrichment for these narrow peak regions. The HOMER software produces a list of known motifs for transcription factors significantly overrepresented when compared to a set of randomly selected background sequences. This list of enriched motifs was further filtered to those sites whose associated transcription factors are expressed in the developing gonad, by comparison to the available Affymetrix array data (Jameson et al., 2012).

We identified 9332 narrow (1kb) regions with H3K4me3 enrichment (Fig. 8A and File 6). A total of 67 motifs were enriched within these peak sequences, of which 33 of the known motifs correspond to transcription factors that are expressed during gonad development (File 6). Seven of these factors are expressed in a cell-type specific manner (Fig. 8B-H).

Sixty one percent of H3K4me3 regions had a Myb (c-Myb) DNA binding motif (q-value = 0.007). Myb is a helix-turn-helix transcription factor with roles in cell cycle regulation (Nakata et al., 2007), hematopoiesis (Mukouyama et al., 1999) and oocyte meiotic maturation (Zheng et al., 2012). *Myb* gene expression was higher in GCs at E11.5 compared to other gonadal cell types (Fig. 8B).

Nanog is a well-characterized transcription factor involved in maintaining pluripotency in embryonic stem cells, proliferation and nuclear reprogramming in primordial germ cells (Theunissen et al., 2011; Yamaguchi et al., 2009). Over 80% of H3K4me3 peak regions (q-value <0.0001) had potential Nanog binding motifs (File 6). Nanog was expressed at much higher levels in GCs compared to other cell types found in the E11.5 gonad (Fig. 8C).

345 *Nuclear factor 1 (NF1)* gene encodes a ubiquitous transcription factor with roles in chromatin  
 346 remodeling (Gonen et al., 2017) and has been found to function with Sf-1 in adrenal  
 347 steroidogenesis (Aigueperse et al., 2001). Sixty percent of H3K4me3 peak sequences had a  
 348 potential NF1 binding site (q-value = 0.02). *Nf1* mRNA is expressed at high levels in all  
 349 gonadal cell types with the exception of the primordial GCs at E11.5 (Fig. 8D). Expression in  
 350 male and female GCs eventually increases following sex determination (E12.5) to similar  
 351 levels of other gonadal cell types by E13.5 (Fig. 8D).

352

353 Nine members of the Ets family of transcription factors were identified as binding to motifs  
 354 located in H3K4me3 narrow peak regions. This protein family has roles in cell lineage  
 355 specification including blood cell differentiation (Ciau-Uitz et al., 2013; Remy and Baltzinger,  
 356 2000). The ETS factor, *Elf1* (*E74-like factor 1*) has an essential role in vascular development  
 357 (Gaspar et al., 2002; Huang et al., 2006). Around a third (34%) of H3K4me3 narrow peak  
 358 regions contained *Elf1* binding motifs (q-value <0.0001). *Elf1* mRNA expression levels were  
 359 lower in germ cells at E11.5, when compared to somatic and interstitial/stroma cells (Fig. 8F,  
 360 P<0.0001). mRNA for another ETS factor, *Friend leukemia integration 1 (Fli1)*, was expressed  
 361 at higher levels in endothelial cells (P<0.0001) compared to other cell lineages (Fig. 9E).

362

363 *Interferon regulatory factor 2 (Irf2)* was expressed at much higher levels in the endothelial  
 364 cell types, compared to both the somatic and germ cells (Fig. 8G, P<0.001 and P<0.0001  
 365 respectively). A small subset of sequences had a *Irf2* DNA binding motif (5%, q-value <0.0001,  
 366 File 6). *Elf-1* and *Irf2* have both been found to induce stem cells to form blood cells in culture  
 367 (Yamamizu et al., 2013).

368

369 The DNA binding motif for TEA domain family member 4 (Tead4, also known as TEF3) was  
 370 enriched for 30% of sequences (q-value 0.01, File 6). Expression profiling indicates the *Tead4*  
 371 gene is expressed at higher levels in endothelial cells compared to other cell types present in  
 372 the gonad (Fig. 8H). Previously, Tead4 was found to directly regulate *Sf1* expression in  
 373 reporter assays (Sakai et al., 2008), and has been linked to VEGF-mediated angiogenesis (Liu  
 374 et al., 2011)

375

### 376 ***DNA sequences associated with H3K27me3 marks***

377 For H3K27me3, 4,847 regions were used in motif analysis (File 6) and identified enrichment  
 378 for 15 known motifs for transcriptions factors. Of these, 6 transcription factors are expressed  
 379 in the E11.5 gonad (Fig. 9B-E).

380

381 *TG-interacting factor 1 (Tgif1)* gene encodes for a homeobox protein that acts as a repressor  
 382 of TGF- $\beta$  and RA signaling (Bartholin et al., 2006; Wotton et al., 1999), and can repress  
 383 embryonic stem cell factors, binding directly to Oct4 (Lee et al., 2015). The majority of  
 384 H3K27me3 peak regions (88%) had a predicted Tgif1 DNA binding motif (q-value = 0.025). At  
 385 E11.5, *Tgif1* mRNA is expressed at high levels in the undifferentiated somatic, endothelial and  
 386 interstitial/stroma tissue, compared to GCs (Fig. 8B,  $P < 0.001$ ). By E13.5, *Tgif1* mRNA is  
 387 expressed at higher levels in male GCs, compared to female GCs E13.5 (Fig. 9B,  $P < 0.0001$ ).

388

389 *Signal transducer and activator of transcription 4 (STAT4)* motif was enriched in ~43% (q-  
 390 value = 0.03) of H3K27me3 narrow peak sequences (File 6). The *STAT4* gene is expressed at  
 391 higher levels in both male and female germ cells at E11.5, in comparison to other cell types  
 392 (Fig. 9C,  $P < 0.0001$ ). STAT4 has multiple roles in development, including in endothelial cell

393 proliferation in zebrafish (Meng et al., 2017), and is expressed in the germ cells of the adult  
394 mouse testis (Herrada and Wolgemuth, 1997)

395

396 The *Nuclear factor of activated T-cells (NfatC1)* gene has roles in lymphatic and valve  
397 endothelial development (Kulkarni et al., 2009; Wu et al., 2011). *NfatC1* was expressed at  
398 higher levels endothelial cells compared to other cell types in the E11.5 gonad (Fig. 9D,  
399  $P < 0.0001$ ). Nine percent of H3K27me3-associated sequences ( $q = 0.0009$ ) were predicted to  
400 contain NfactC1 DNA binding motifs (File 6).

401

402 The *Forkhead box protein O1 (FoxO1)* gene has a role in regulating human and mouse ESC  
403 pluripotency through regulation of *SOX2* and *OCT4* gene expression (Zhang et al., 2011), and  
404 also functions in the adult mouse male germline and ovarian granulosa cells (Liu et al., 2013).  
405 *Foxo1* mRNA levels were higher in GCs and endothelial cells at E11.5 compared to other  
406 gonadal cell types (Fig. 9E,  $P < 0.0001$ ). The FoxO1 binding motif was present in 70% of peak  
407 sequences ( $q$ -value = 0.0001).

408

## 409 Discussion

410

411 We successfully performed ChIP-seq analysis for H3K4me3 and H3K27me3, histone marks  
412 that represent two different transcriptional states, on E11.5 UGRs. The resulting signal  
413 distribution profiles reflected transcriptional activity in the E11.5 gonad and may indicate  
414 areas of the genome either in an active or repressed state, including potential enhancer  
415 regions.

416

417 Immunofluorescence staining of the UGR revealed that many gonadal cells had higher levels  
 418 of these histone modifications compared to nearby cells. While some of these cells are likely  
 419 to be PGCs, others are likely to represent precursors of other cell lineages required for gonad  
 420 development. Future studies will address how these marks are first established and what  
 421 happens to these marks over the course of gonadal development. This study used a time-point  
 422 at the beginning of sex determination and prior to hormone production, and we do not  
 423 address epigenetic dimorphism between the sexes at E11.5. Therefore, we cannot discount  
 424 the possibility that sexually dimorphic epigenetic patterns exist prior to sex determination  
 425 (earlier than E11), and perhaps are based on the karyotype of the embryo. Histone  
 426 modifications are enzymatically added and removed, therefore the enzymes involved are  
 427 important regulators of cell differentiation and fate (Butler et al., 2012). While the X and Y-  
 428 chromosomes both have lysine demethylase genes, known as *Jarid1c* and *Jarid1d* respectively,  
 429 it is unknown if they have a role in early gonad development. However, in terms of sex-  
 430 determination, the histone demethylase enzyme, JmJc domain-containing protein (Jmjd1a)  
 431 was recently shown to be required for correct expression of the *Sry* gene and male sex  
 432 determination in mice (Kuroki et al., 2017). It will also be important to consider when and  
 433 how any sex-specific histone modifications are first established during cell-fate specification  
 434 in the developing gonad (Butler et al., 2012). (Kuroki et al., 2017).

435  
 436 Epigenetic modifications are essential for cell fate and lineage specification. DNA binding  
 437 motifs located within narrow peak regions included transcription factors that were  
 438 themselves expressed in a cell-specific manner. This identified several new candidate  
 439 transcription factors that may have a role in the undifferentiated gonad. *Tgif1* is a known  
 440 repressor of retinoic acid signaling (Bartholin et al., 2006) and is expressed at significantly  
 441 higher levels in male GCs by E13.5 (Fig. 9B). Repression of RA signaling prevents male GC

entry into meiosis (Bowles et al., 2006). Expression of another transcription factor, cMyb was also highest in E11.5 GCs (Fig. 8B). This gene was previously proposed to regulate *KIT* expression (Mithraprabhu and Loveland, 2009), *KIT* is required for germ cell migration and maturation (Fleischman, 1993).

Another transcription factor gene of interest was *Nfatc1*. Gonad *Nfatc1* gene expression is much higher in endothelial cells (Fig 9D), suggesting it has a role in vascular cell fate in the gonad. Previously, it was shown that *Sox9* inactivation in the mouse heart resulted in ectopic expression of *Nfatc1* in heart mesenchymal cells, and in wild-type animals *Nfatc1* is expressed only in the endothelial cells of the heart (Akiyama et al., 2004). This suggests a negative relationship between *Sox9* and *Nfatc1*, perhaps in restricting cell lineage specific-gene expression.

Several transcription factors predicted to bind to other DNA binding motifs enriched within our dataset were not expressed in the developing gonad based on available array data (File 6). However, these factors may have roles later in development, or in the post-natal gonad. *Recombination signal binding protein for immunoglobulin kappa J region (Rbpj)* gene encodes for a Notch pathway regulator, and conditional knockout results in reduced testis size. *Rbpj* is required for the testis stem cell niche (Garcia et al., 2014). Therefore, while *Rbpj* gene expression is detected in the early embryonic gonad, it also affects male fertility later in life.

We determined a set of genomic regions that were enriched with both histone marks in chromatin extracted from E11.5 gonads. Different cell lineages have distinct epigenetic profiles (Hawkins et al., 2010). From this data, we cannot be sure that a given genome region

466 is actually marked by both modifications in the same cell, as we used a mixed population of  
 467 cells, and we thus are observing the average signal profile over multiple cell types. Therefore,  
 468 these regions cannot be termed bivalent regions based on this analysis. Future studies, using  
 469 cell-sorting methods, such as those used by Jameson *et al.*, 2012, and the development of new  
 470 ChIP methods requiring less material may yield enough sequencing data to examine the  
 471 epigenetic landscape of individual cell populations within the UGR.

472

473 Wnt signaling pathway genes were significantly overrepresented as being epigenetically  
 474 marked with both modifications. This pathway has roles in formation of the UGR for both  
 475 sexes, but at later stages of gonad development, it functions in largely in ovarian development  
 476 only (Boyer et al., 2010; Ottolenghi et al., 2007). Wnt4 and Rpo1 are essential for proliferation  
 477 of coelomic epithelium in both XY and XX gonads (Chassot et al., 2012). The absence of *Wnt4*  
 478 in female mice results in masculinization with the development of Wolffian ducts and absence  
 479 of Müllerian ducts (Bernard and Harley, 2007; Vainio et al., 1999). Further studies have  
 480 shown that canonical *Wnt4* expression persists in the developing ovary to prevent testicular  
 481 formation by repressing the SOX9-Fgf9 positive-feedback loop (Kim et al., 2006). *Wnt5a* is  
 482 required for the development of posterior Müllerian duct structures (the cervix and vagina),  
 483 primordial germ cell migration and testicular development (Chawengsaksophak et al., 2012;  
 484 Mericskay et al., 2004).

485

486 Overall, this study provides first insight into the epigenetic landscape of the entire UGR at  
 487 E11.5 and provides an important dataset for further analysis of regulatory elements active  
 488 during early gonad development

489



## 490 **Methods**

### 491 *Animals*

492 The University of Otago Animal Ethics Committee granted ethical approval for this study  
493 (approvals ET17/12 (November 2012) and ET25/15 (May 2015)). Embryonic development  
494 was timed from the presence of a copulation plug, beginning at 0.5 days post coitum (dpc) to  
495 account for the period between fertilization and time of plug observation.

496

### 497 *Chromatin immunoprecipitation*

498 Gonad primordium and associated mesonephros tissue was dissected at E11.5 and pooled in  
499 1 mL 1x PBS on ice and fixed in 25  $\mu$ L 37% formaldehyde to crosslink together the DNA and  
500 associated proteins while rocking for 10 min. The crosslinking reaction was stopped with  
501 glycine (final concentration of 1 mg/mL). Five litters of crosslinked UGR tissue were pooled  
502 together, pelleted by centrifugation and resuspended in 500  $\mu$ L membrane extraction buffer  
503 (20 mM TrisCl pH 8.0, 85mM KCl, 0.5% NP-40) plus 5  $\mu$ L of proteinase inhibitor (20  $\mu$ g/ $\mu$ L).

504 Homogenized tissue was placed on ice for 10 min and centrifuged at 9,000g for 3 min. Pellets  
505 were resuspended in 500  $\mu$ L digestion buffer (50 mM TrisCl pH 8.0, 5mM CaCl<sub>2</sub>, containing 0.5  
506  $\mu$ L DTT (100 mM) and 1  $\mu$ L MNase (300 U/ $\mu$ L)) and incubated at 37°C for 30 min, with mixing  
507 every 5 min to digest the chromatin. After the incubation, 50  $\mu$ L of stop solution (200mM  
508 EGTA (pH 8.0)) was added and the sample was placed on ice for 5 min. Samples were  
509 centrifuged at 9,000g for 3 min and the supernatant removed. To extract the digested  
510 chromatin, nuclear extraction buffer (1% SDS, 10 mM EDTA pH 8.0, 50 mM TrisCl pH 8.0) was  
511 added to the pellet to give a final volume of 250  $\mu$ L and sample left on ice for 15 min, with  
512 vortexing every 5 min for 15 s. Samples were centrifuged at 9,000g for 3 min, with the  
513 supernatant now containing the desired fragmented chromatin. 10  $\mu$ L was retained to serve as  
514 the “input” control sample for sequencing.

515

516 To bind the antibodies to the magnetic beads, 25  $\mu$ L of Dynabeads (Life Technologies) were  
 517 washed 3 times in block solution (0.5% BSA in PBS). 10  $\mu$ g of primary antibody (either anti-  
 518 H3K27me3 or anti-H3K4me3) in 1 mL block solution was added to the Dynabeads. Mock  
 519 tubes were set up without primary antibodies, containing 1 mL of block solution, 25  $\mu$ L  
 520 Dynabeads and preimmune serum. Beads were rotated at 4°C overnight, washed 3 times in  
 521 block solution to remove unbound antibody and resuspended in 1.25 mL block solution. Equal  
 522 volumes of the chromatin-containing supernatant was added to the primary antibody or  
 523 mock tubes. Microfuge tubes containing Dynabeads were left to rotate at 4°C overnight.  
 524 Antibodies used for ChIP and immunofluorescence were anti-H3K4me3 (ab8580) and anti-  
 525 H3K27me3 (ab6002), both from Abcam.

526

527 Following immunoprecipitation, the beads were washed five times with wash buffer 1 (50  
 528 mM HEPES-KOH (pH 7.5), 500mM LiCl, 1 mM EDTA, 1.0% NP-40 and 0.7% sodium-  
 529 deoxycholate), followed by two washes with wash buffer 2 (TE with 50 mM NaCl). Bound  
 530 nucleoprotein complexes were extracted with elution buffer (50 mM TrisCl pH 8.0, 1% SDS)  
 531 at 65°C for 10 min. Protein-DNA cross-linking was reversed for input and ChIP fragments and  
 532 proteins digested by Proteinase-K (1  $\mu$ g) 65°C for 90 min, followed by phenol-chloroform  
 533 extraction. DNA samples were used to construct Thruplex DNA libraries and sequenced on a  
 534 Illuminia HiSeq platform generating 50 bp single end reads. Sequencing reads were aligned  
 535 to the mouse genome (mm9) prior to peak calling.

536

537 ***ChIP-seq data analysis***

Sequences returned were assessed for quality by Phred(Q) score. High quality reads were aligned to the mouse genome (mm9) using Map with BWA (Galaxy Version 0.3.1, with default settings). Poorly mapped reads (MAPQ score <20) were removed by filtering with samtool\_filter2 (1.1.1). To examine correlation between replicates, a correlation matrix was generated using multiBamSummary (2.4.1) with a bin size of 10000. The correlation heatmaps were plotted using plotCorrelation (2.4.1), using Pearson correlation.

544

To generate BigWig files for signal visualization and bedgraph files for MACS2 analysis, ChIP-seq output (plus antibody) aligned reads were normalized to the Input signal using bamCompare (2.5.0) using the following settings: 50 bin, readCount set to scale samples to the smallest dataset and ratio to compare to input sample.

549

To annotate signal with respect to gene features, HOMER and CEAS software packages were used (Heinz et al., 2010)(Heinz et al., 2010; Shin et al., 2009). HOMER was used to annotate genes and gene regions (annotatepeaks function, tag count distribution across the gene body). CEAS (1.0.0) analysis was carried out using default settings (bin size = 50) with previously generated bigwig files and MACSbroadcall peak regions for each histone mark.

555

The Deeptools (Ramirez et al., 2014) package was firstly used to generate a matrix (computematrix (2.5.0)) to calculate the signal around the gene reference point (start of the region, TSS as the reference-point with a bin size of 50). PlotProfile was used to plot the signal over gene regions. Heatmaps were created using plotHeatmap (2.5.0, averageTypeSummaryPlot=mean, with kmeans clustering).

561

MACS2 (Feng et al., 2012) bdgbroadcall package (2.1.1) using the normalized (to input) bedgraph file to call variable size peak regions, with the following settings: cutoff for peaks set as 5, minimum length of peak to 200, maximum gap between significant peaks was set to tag size (50) and maximum linking between significant peaks of 1500.

### ***RNA expression data analysis.***

Robust Multi-array Average (RMA) normalized values for each gene and cell lineage were obtained from Jameson et al., supplementary data files (Jameson et al., 2012). This study used mouse lines with cell-specific markers and fluorescence-activated cell sorting (FACS) to isolate difference cell populations. Markers used were: *Sry*-EGFP/*Sox9*-ECFP supporting cells, *Mafb*-EGFP to isolate interstitial (XY) and stromal cells (XX), germ cells were isolated using *Oct4*-EGFP and endothelial cells with *Flk1*-mCherry. Gene expression were analyzed using a Affymetrix Genechip 1.0 ST array (Jameson et al., 2012) and reported as normalized RMA values.

### ***Motif identification using HOMER***

HOMER (Heinz et al., 2010) was used to create tag libraries for each ChIP-seq data set. Findpeaks (part of the HOMER package) was used to find genomic regions of ~1kb signal enrichment compared to surround regions, with following parameters: -minDist 2500 -tagThreshold 25 -L 0. The coordinates of the regions identified for histone marks are listed in additional data File 6. To find motifs within HOMER 1kb ChIP-seq regions, we used findMotifs (HOMER) using default parameters (-size given).

### ***PANTHER GO and Pathway analysis***

586 The RefSeq transcript list for each signal profile cluster was used for PANTHER GO-Slim-  
587 Biological processes with Fisher's Exact with FDR multiple test correction. The returned GO  
588 annotations and their adjusted p-values were visualized using Revigo and Treemap (Supek et  
589 al., 2011).

590

591 Genomic coordinates for regions that enriched within both MACS peak data sets were  
592 submitted Genomic Regions Enrichment of Annotations Tool (GREAT (McLean et al., 2010))  
593 using default parameters and mouse genome (mm9) as background, to generate a list of genes  
594 nearby and overlapping with each peak region. This gene list was inputted into PANTHER for  
595 GO analysis (File 5). PANTHER pathway analysis P-values are adjusted for Bonferroni  
596 correction.

597

### 598 ***Immunofluorescence of paraffin sections***

599 Sections of E11.5 embryos were de-paraffinized and rehydrated as described previously  
600 (Yang and Wilson, 2015). For antigen retrieval, slides were places in sodium citrate buffer  
601 (pH 6.0) and heated in a microwave for 30 min. Slides were left to cool at room temperature  
602 and then rinsed in dH<sub>2</sub>O. Slides were washed three times with PBTx (PBS with 0.1% Triton X-  
603 100) and then blocked with 10% heat inactivated sheep serum in PBTx for 2 h at room  
604 temperature. Primary antibodies were diluted in blocking solution and incubated overnight at  
605 4°C. For each secondary, a control staining (no primary antibody) was performed. Samples  
606 were washed with PBTx three times to remove unbound primary antibodies and then blocked  
607 for 20 min. Secondary antibodies were diluted in blocking solution and added to the slides  
608 before incubation at room temperature for 2 h. Samples were washed three times with PBTx  
609 before mounting. Staining was imaged on a Zeiss LSM 710 confocal microscope.

610

611 Secondary antibodies used were donkey anti-rabbit (Alexa Fluor 488, Life Technologies) and  
 612 anti-mouse (DyLight® 488, Abcam) to detect anti-H3K4me3 and anti-H3K27me3 respectively.  
 613 Antibody dilutions used were as follows: anti-H3K4me3 (1 in 50), anti-H3K27me3 (1 in 50),  
 614 donkey anti-rabbit (1 in 100), donkey anti-mouse (1 in 400).

615

# 616 **Data access**

617 ChIP-seq data has been deposited in Gene Expression Omnibus (GEO) with the accession  
 618 number GSE109380.

619

# FIGURE LEGENDS

## Figure 1. Detection of histone marks H3K27me3 and H3K4me3 marks in the UGR. A.

Double immunofluorescence staining for H3K27me3 (green) and H3K4me3 (red). The gonad is outlined with a dotted line. Scale bar = 20  $\mu$ m. Dashed box indicates region shown in B.

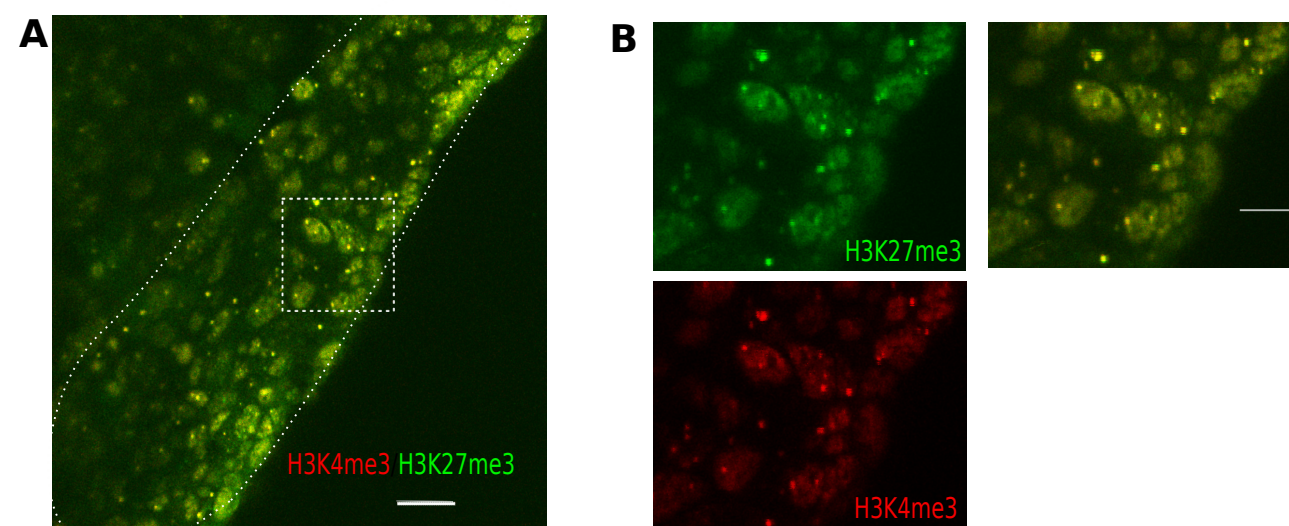

628 **Figure 2 ChIP-seq for H3K4me3 and H4K27me3 histone marks. A.** Overview of the ChIP-  
629 sequencing experiments. **B.** Signal profile with respect to the average gene body and 2 kb  
630 upstream, 4kb downstream. **C.** ChIP-seq peak location with respect to genome annotations of  
631 protein coding genes. Abbreviations: Transcriptional start site (TSS), transcription end site  
632 (TES).

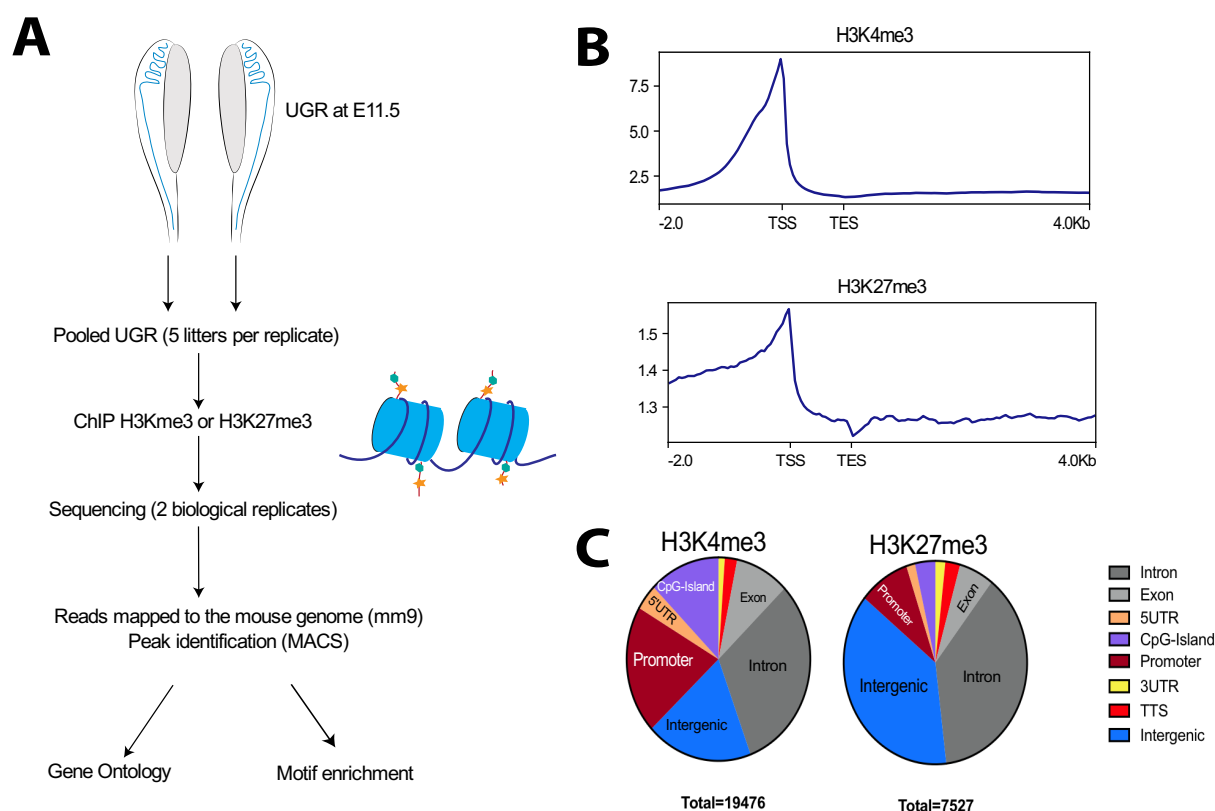

633

634

635



636 **Figure 3. Examples of signal distribution near three genes required for early gonad**  
637 **formation and sex-determination. A. *Sf1/Nr5a1* gene B. *Wt1* gene. C. *Sox9* gene.** The TESCO  
638 enhancer (red bar) is also shown for the *Sox9* gene. Signal tracks for each histone mark are  
639 shown above each gene model. Black bars indicate peak regions identified by MACS analysis.  
640 Boxed region indicates enriched signal for both histone marks and therefore, the location of a  
641 putative enhancer.

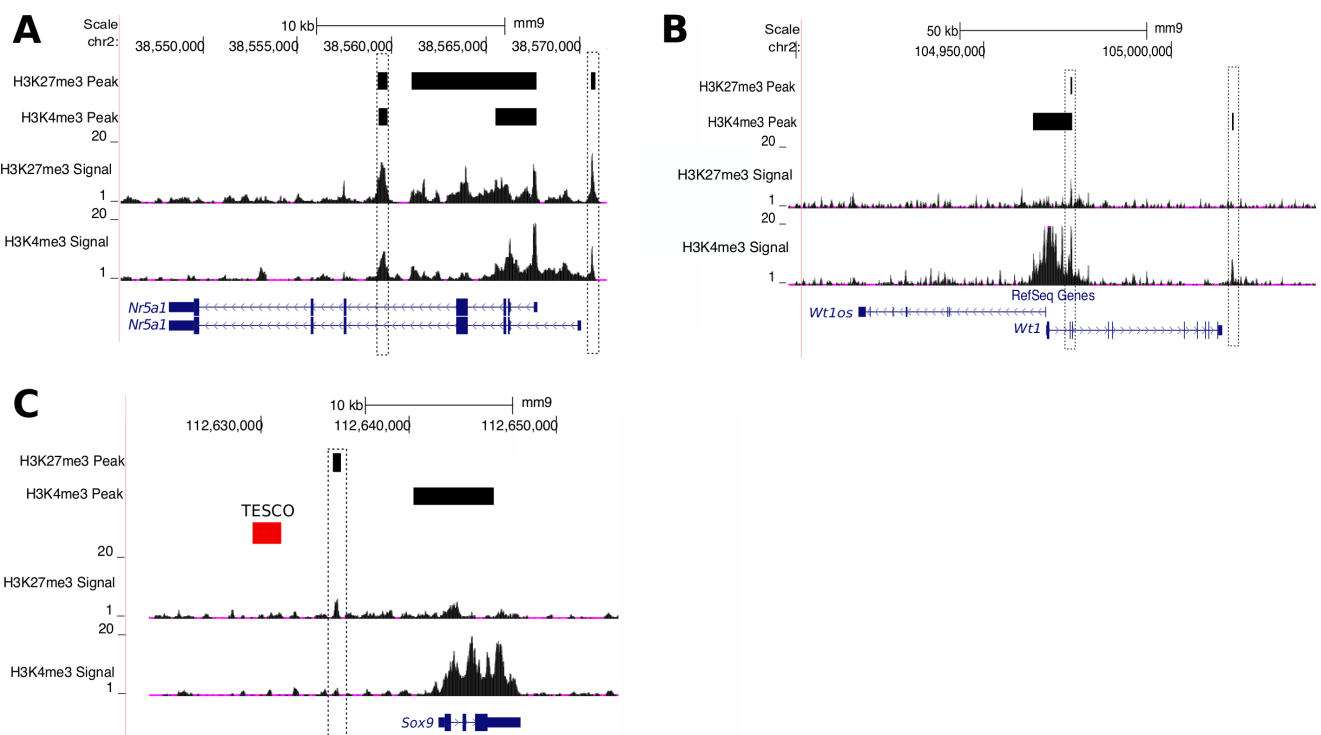

645 **Figure 4 Heatmap profile for H3K4me3 and GO analysis for RefSeq genes cluster.**

646 **A.** Heatmap of H3K4me3 signal density using K-means clustering. Average signal profile is  
 647 shown above each heatmap. Read counts were considered around the TSS (+/- 10 kb). Blue  
 648 indicates low signal and Red indicates an area of high signal. **B.** Treemap summarizing GO  
 649 analysis for cluster 1 genes (PANTHER slim biological processes). **C.** Treemap visualizing  
 650 cluster 2 GO analysis (PANTHER slim biological processes). Boxes with similar GO-terms are  
 651 grouped together and are displayed with the same color. The box size represents the  $-\log_{10}$   
 652 P-value of GO-term enrichment. Additional Treemap for cluster 3 is provided in  
 653 supplementary Fig. S4.



655 **Figure 5. Cluster and GO analysis for H3K27me3 whole genome distribution.**

656 **A.** Signal distribution heatmap and K-means clustering for H3K27me3. Read counts were

657 considered around the TSS (+/- 10 kb). Blue indicates low signal and Red indicates an area of

658 high signal. **B.** Treemap of GO pathways (PANTHER slim biological processes)

659 overrepresented for cluster 1. **C.** Treemap for cluster 3 enriched GO-terms (PANTHER slim

660 biological processes). GO treemaps for the other signal clusters are provided in Fig. S5.

661

662

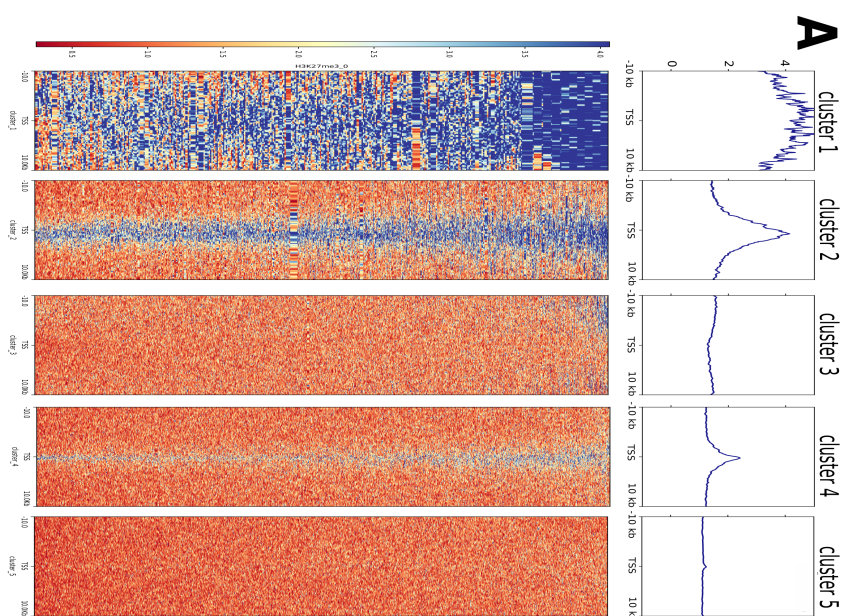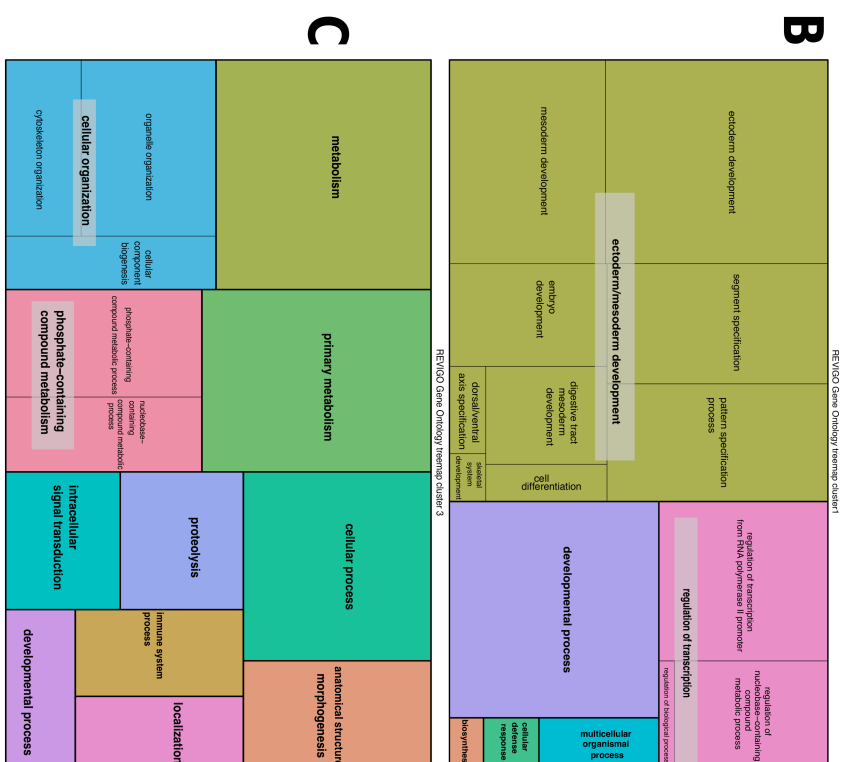

665 **Figure 6. Gonadal expression of genes overlapping with distinct H3K4me3 and**  
 666 **H3K27me3 signal profiles.**

667 **A.** Average gene expression for all cell types, for H4K4me3 cluster 1 and H3K27me3 cluster 2  
 668 genes. These two clusters have high signal density for each histone mark around the gene  
 669 body. **B and C.** Expression of genes associated with each signal profile cluster, per cell lineage.  
 670 One-way ANOVA Tukey's multiple comparisons test adjusted P-value <0.001 (\*\*), <0.0001  
 671 (\*\*\*\*). Abbreviations: endothelial cells (Endo), germ cells (GC), interstitial/stroma (Inter),  
 672 somatic cells (Som). Cluster number is indicated for each plot (eg 11Endo\_1 is gene  
 673 expression of cluster 1 genes in the endothelial cell lineage). Normalized gene expression  
 674 data was taken from (Jameson et al., 2012).

675

676

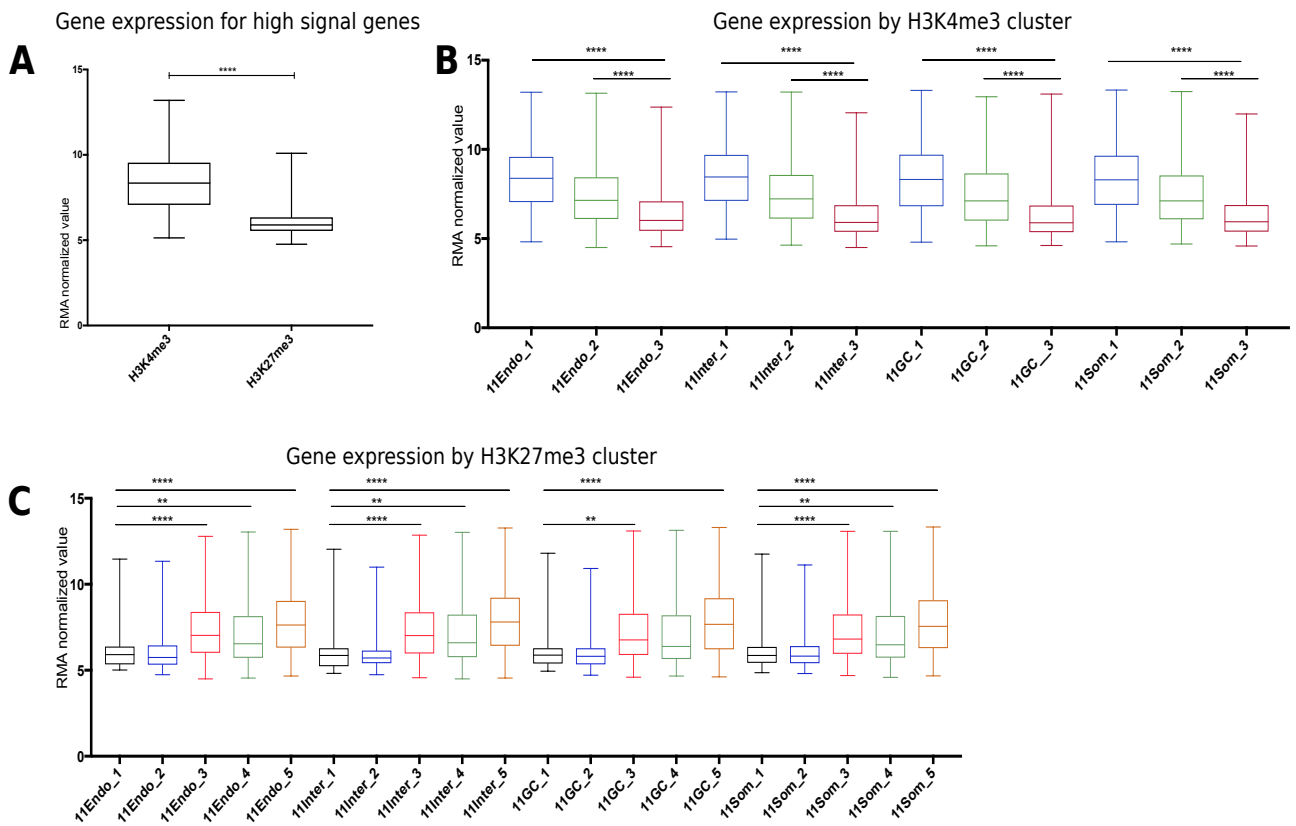

677  
678

679 **Fig. 7. Regions overlap between H3K27me3 and H3K4me3.**  
680 **A.** Identification of common H3K4me3 and H3K27me3 MACS peak regions. **B.** PANTHER  
681 pathway classification for genes associated with H3K4me3-H3K27me3 intersection peak  
682 regions. Example of shared peak regions for *Fgf9* (**C**) and *estrogen receptor gene 1* (*Esr1*, **D**).  
683 Regions that intersect between the two peak files are boxed.

684

685



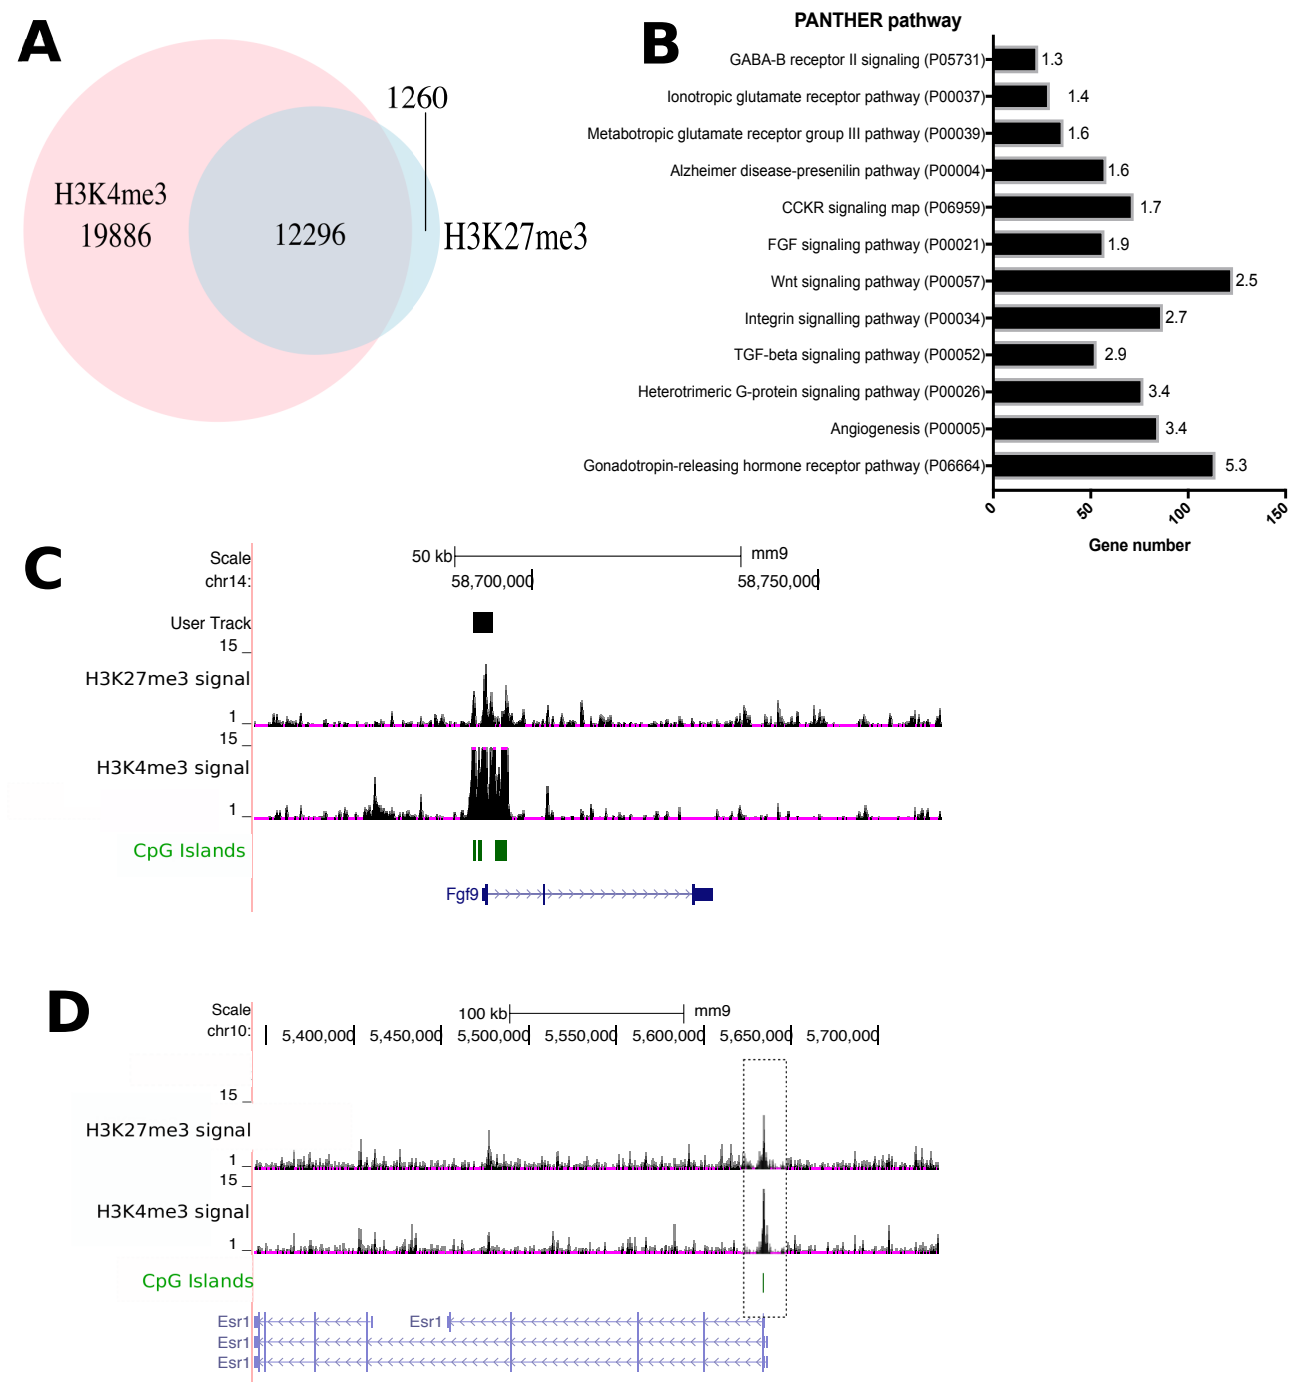

686  
687

688 **Figure 8. DNA motifs enriched within H3K4me3 HOMER peak regions.**

689 **(A)** Signal profile for H3K3me3 across the genome regions (3 kb), centered on the middle of

690 the peak interval. Enriched DNA binding motifs and their cell-lineage expression profiles for

691 germ, interstitial, supporting and endothelial cells at E11.5, E12.5 and E13.5 (Jameson et al.,

692 2012). Profiles are shown for *Myb* **(B)**, *Nanog* **(C)**, *Nf1* **(D)**, *Fli1* **(E)**, *Elf1* **(F)**, *IRF2* **(G)** and

693 *TEAD4* **(H)** genes. Mean +/- standard error of the mean. Statistical analysis: two-way ANOVA

694 Tukey's multiple comparisons test, adjusted P-value <0.001 (\*\*), <0.0001 (\*\*\*\*).

695

696

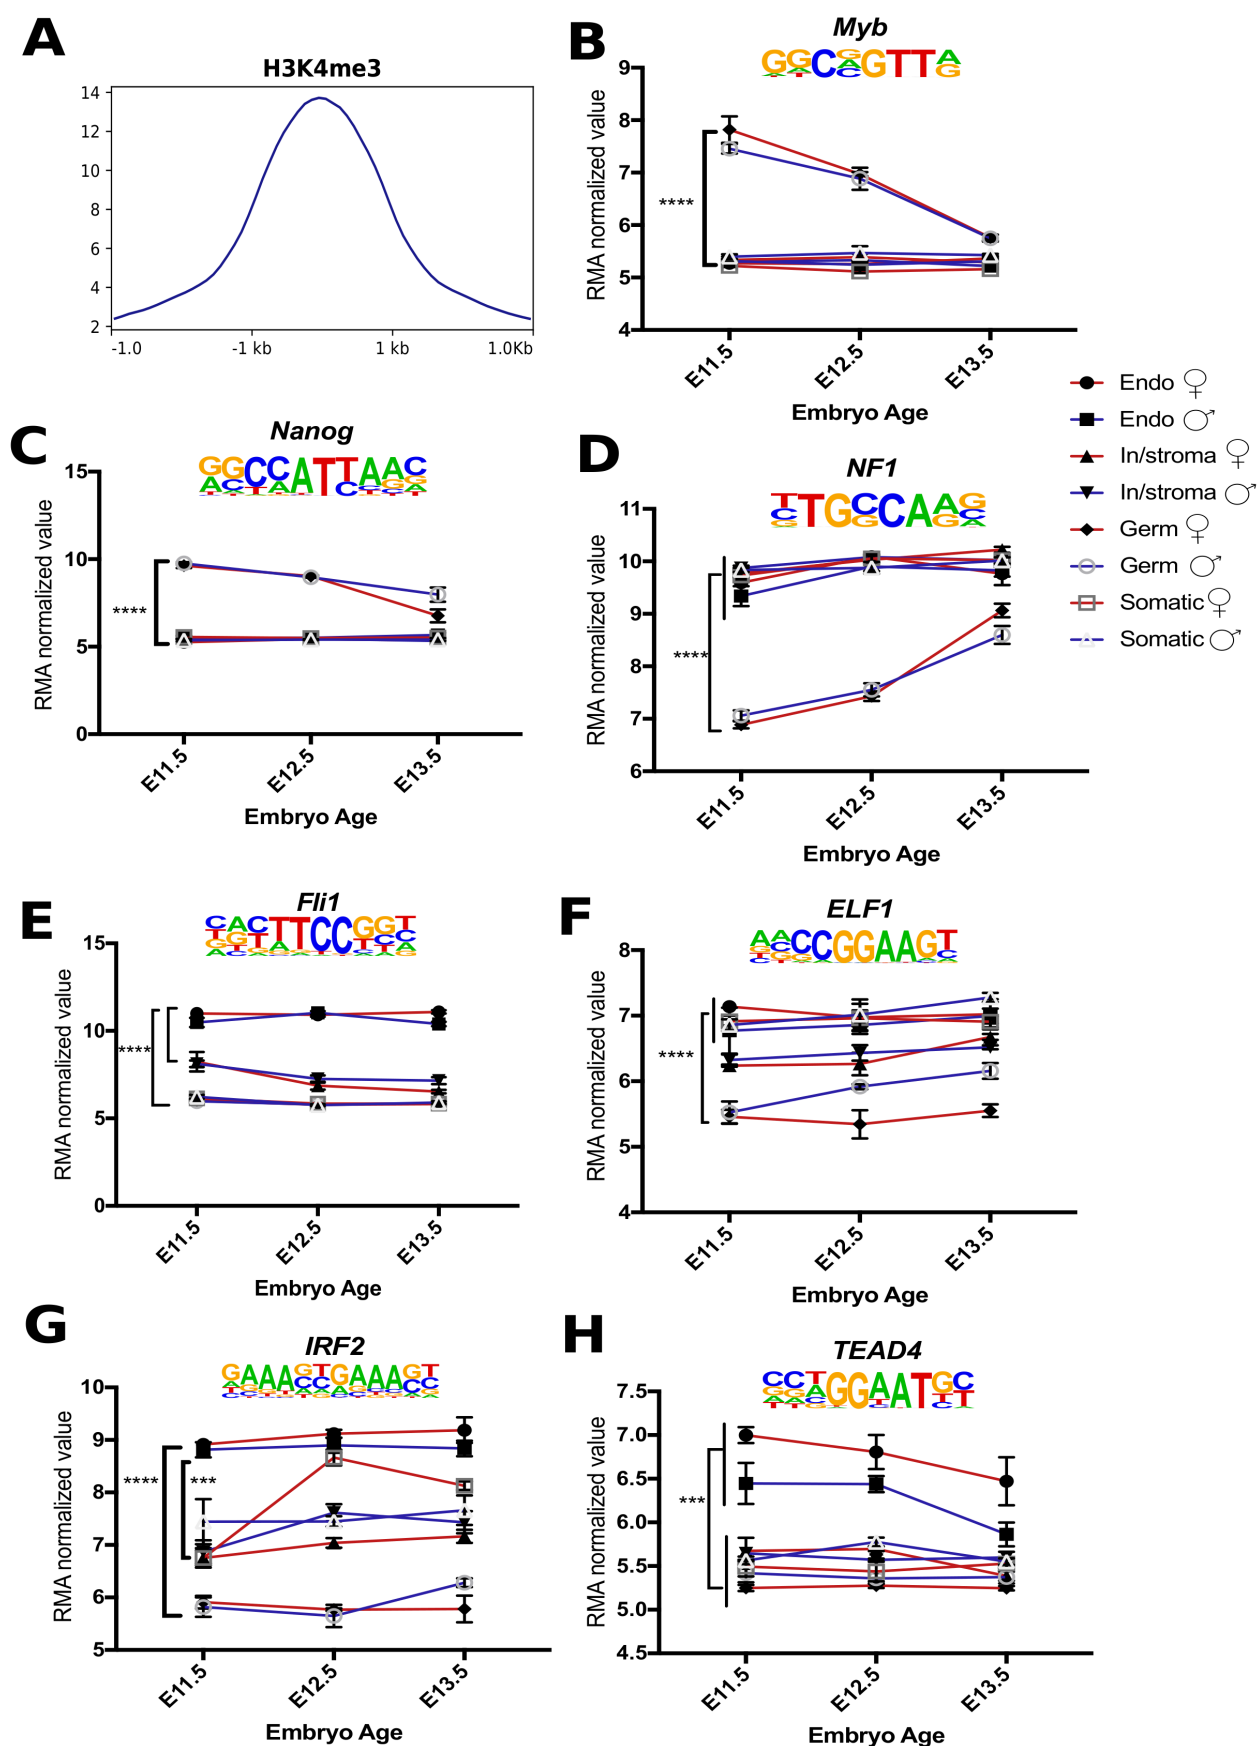

698 **Figure 9. DNA motifs overrepresented within 1kb peak regions enriched with the**  
699 **H3K27me3 modification. (A)** Signal profile for H3K27me3 across the genome regions (3 kb),  
700 centered on the middle of the peak interval.

701 Enriched DNA binding motifs and their cell-lineage normalized expression profiles from E11.5  
702 to E13.5 of gonad development (Jameson et al., 2012). Profiles are shown for *Tgif1* (B), *STAT4*  
703 (C), *NfatC1* (D) and *Foxo1* (E) genes. Mean +/- standard error of the mean. Statistical analysis:  
704 two-way ANOVA Tukey's multiple comparisons test, adjusted P-value <0.001 (\*\*), <0.0001  
705 (\*\*\*\*).

706

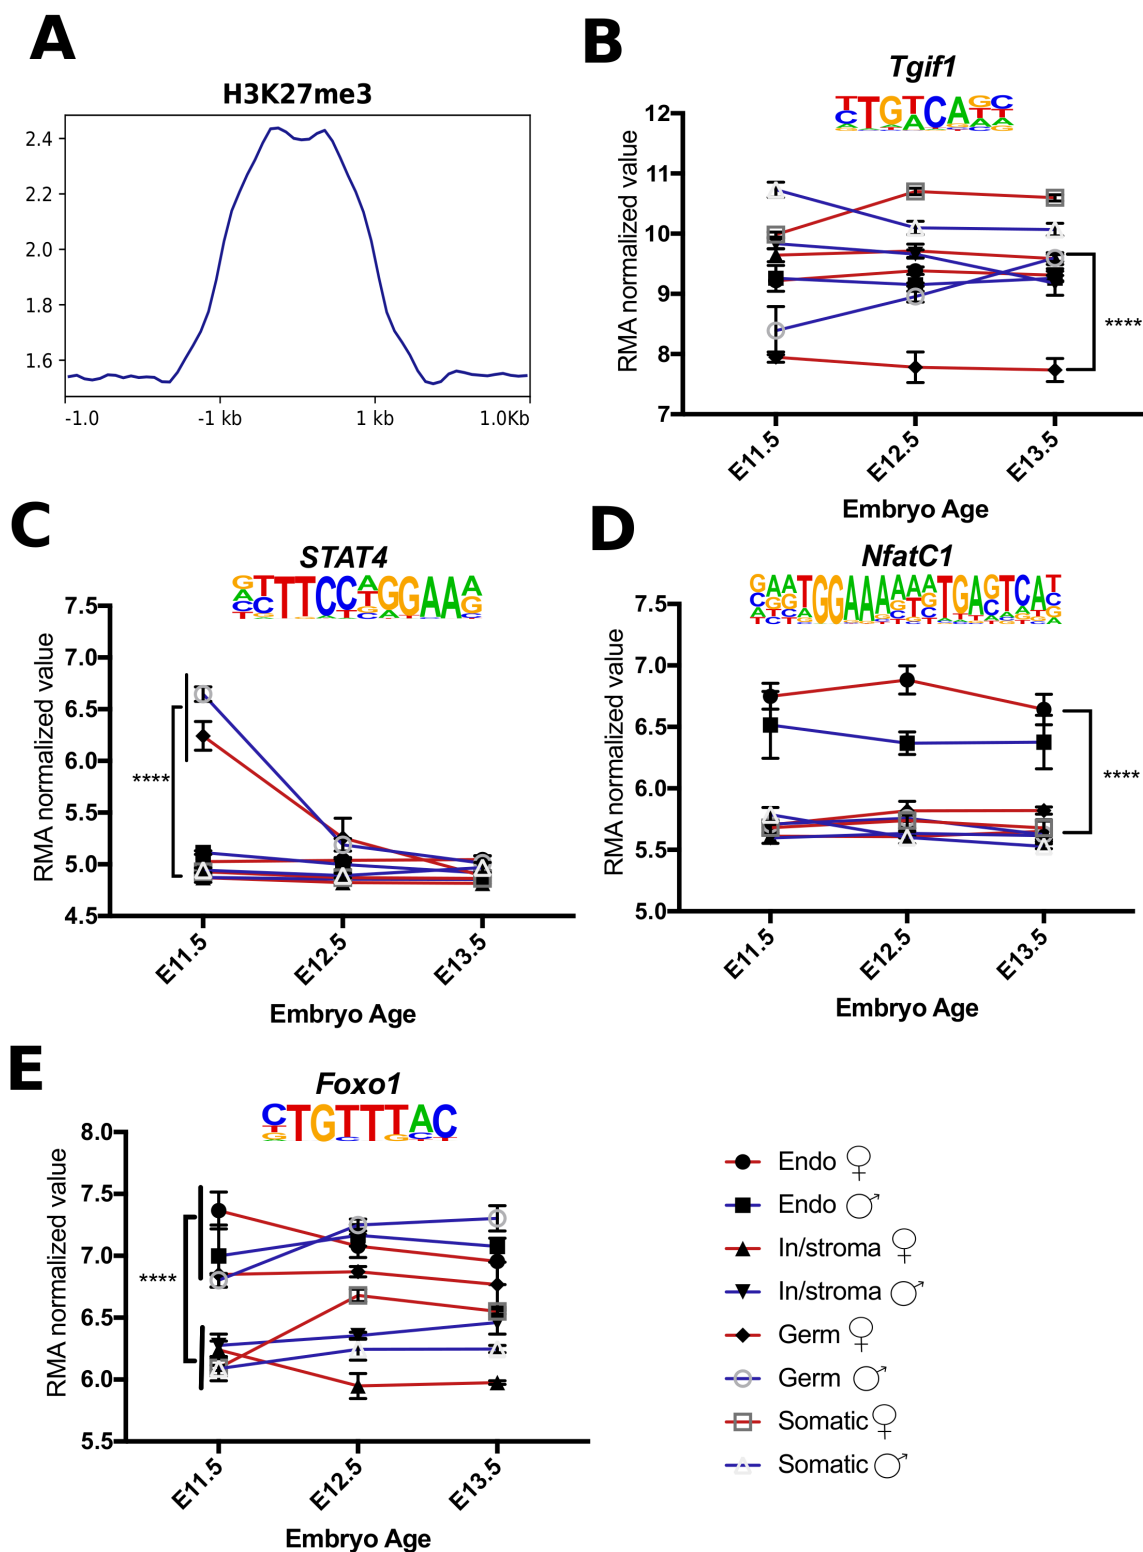

## 709 **Acknowledgements**

710

711 Research described here was funded by a University of Otago Research Grant to Megan  
 712 Wilson. Yisheng Yang was supported by a University of Otago PhD scholarship. We thank  
 713 James Smith, Susie Szakats, Kathy Sircombe, Jeremy McCallum-Loudaec, Rebecca Clarke and  
 714 Lyvianne Decouryte for feedback on manuscript drafts.

715  
716

## 717 **Supplementary Data files**

### 718 **File 1. Sequencing data mapping statistics.**

719

### 720 **File 2. List of regions with similar signal distribution identified by**

721 **deepTools/plotHeatmap using k-means clustering analysis.** Output file giving region

722 coordinates, nearby feature/gene and cluster group. Sheet1: H3K27me3 signal clusters.

723 Sheet 2: H3K4me3 signal clusters.

724

### 725 **File 3. PANTHER Gene ontology analysis for H3K4me3 clusters.** Each sheet summarizes

726 the PANTHER analysis carried out for the cluster gene list. Each gene list includes genes

727 associated with each signal profile (cluster).

728

### 729 **File 4. PANTHER Gene ontology analysis for H3K27me3 clusters.** Each sheet summarizes

730 the PANTHER analysis carried out for the cluster gene list. Each gene list includes genes

731 associated with each signal profile (cluster).

732

### 733 **File 5. MACS broadcall peak regions.** Excel file with the peak regions identified for each

734 histone mark and a list of peak regions that are shared between both marks (“overlapping

735 regions”). Sheet 1: MACS broadcall peaks for H3K4me3. Sheet2: MACS broadcall peak regions

736 for H3K27me3. Sheet 3: Overlapping peak regions. Sheet 4: DAVID annotation analysis

737 (summarized in Fig. 7B). Sheet 5: Genes located near shared peak regions (identified using

738 GREAT).

739

### 740 **File 6. Motif analysis results for narrow peak regions.** 1 kbp peak regions identified by

741 HOMER analysis for H3K27me3 and H3K4me3. Motifs Homer analysis for known DNA



742 binding motifs. Grouped into motifs of factors expressed in the early gonad (Jameson et al.,  
743 2012) and those factors not present in array data by Jameson *et al.* 2012.

744

745

746 Supplementary figures are provided in a single pdf file.

# References

- Aigueperse, C., Val, P., Pacot, C., Darne, C., Lalli, E., Sassone-Corsi, P., Veyssiere, G., Jean, C., Martinez, A., 2001. SF-1 (steroidogenic factor-1), C/EBPbeta (CCAAT/enhancer binding protein), and ubiquitous transcription factors NF1 (nuclear factor 1) and Sp1 (selective promoter factor 1) are required for regulation of the mouse aldose reductase-like gene (AKR1B7) expression in adrenocortical cells. *Mol Endocrinol* 15, 93-111.
- Akiyama, H., Chaboissier, M.C., Behringer, R.R., Rowitch, D.H., Schedl, A., Epstein, J.A., de Crombrughe, B., 2004. Essential role of Sox9 in the pathway that controls formation of cardiac valves and septa. *Proc Natl Acad Sci U S A* 101, 6502-6507.
- Anderson, R., Fassler, R., Georges-Labouesse, E., Hynes, R.O., Bader, B.L., Kreidberg, J.A., Schaible, K., Heasman, J., Wylie, C., 1999. Mouse primordial germ cells lacking beta1 integrins enter the germline but fail to migrate normally to the gonads. *Development* 126, 1655-1664.
- Atlasi, Y., Stunnenberg, H.G., 2017. The interplay of epigenetic marks during stem cell differentiation and development. *Nat Rev Genet* 18, 643-658.
- Bannister, A.J., Kouzarides, T., 2011. Regulation of chromatin by histone modifications. *Cell Res* 21, 381-395.
- Bartholin, L., Powers, S.E., Melhuish, T.A., Lasse, S., Weinstein, M., Wotton, D., 2006. TGIF inhibits retinoid signaling. *Mol Cell Biol* 26, 990-1001.
- Bernard, P., Harley, V.R., 2007. Wnt4 action in gonadal development and sex determination. *Int J Biochem Cell Biol* 39, 31-43.
- Bernard, P., Ryan, J., Sim, H., Czech, D.P., Sinclair, A.H., Koopman, P., Harley, V.R., 2012. Wnt signaling in ovarian development inhibits Sf1 activation of Sox9 via the Tesco enhancer. *Endocrinology* 153, 901-912.
- Bernstein, B.E., Mikkelsen, T.S., Xie, X., Kamal, M., Huebert, D.J., Cuff, J., Fry, B., Meissner, A., Wernig, M., Plath, K., Jaenisch, R., Wagschal, A., Feil, R., Schreiber, S.L., Lander, E.S., 2006. A bivalent chromatin structure marks key developmental genes in embryonic stem cells. *Cell* 125, 315-326.
- Birk, O.S., Casiano, D.E., Wassif, C.A., Cogliati, T., Zhao, L., Zhao, Y., Grinberg, A., Huang, S., Kreidberg, J.A., Parker, K.L., Porter, F.D., Westphal, H., 2000. The LIM homeobox gene Lhx9 is essential for mouse gonad formation. *Nature* 403, 909-913.
- Bowles, J., Knight, D., Smith, C., Wilhelm, D., Richman, J., Mamiya, S., Yashiro, K., Chawengsaksophak, K., Wilson, M.J., Rossant, J., Hamada, H., Koopman, P., 2006. Retinoid signaling determines germ cell fate in mice. *Science* 312, 596-600.
- Boyer, A., Lapointe, E., Zheng, X., Cowan, R.G., Li, H., Quirk, S.M., DeMayo, F.J., Richards, J.S., Boerboom, D., 2010. WNT4 is required for normal ovarian follicle development and female fertility. *Faseb J* 24, 3010-3025.
- Butler, J.S., Koutelou, E., Schibler, A.C., Dent, S.Y., 2012. Histone-modifying enzymes: regulators of developmental decisions and drivers of human disease. *Epigenomics* 4, 163-177.
- Capel, B., 2017. Vertebrate sex determination: evolutionary plasticity of a fundamental switch. *Nat Rev Genet* 18, 675-689.
- Carre, G.A., Couty, I., Hennequet-Antier, C., Govoroun, M.S., 2011. Gene expression profiling reveals new potential players of gonad differentiation in the chicken embryo. *PLoS One* 6, e23959.
- Chassot, A.A., Bradford, S.T., Auguste, A., Gregoire, E.P., Pailhoux, E., de Rooij, D.G., Schedl, A., Chaboissier, M.C., 2012. WNT4 and RSPO1 together are required for cell proliferation in the early mouse gonad. *Development* 139, 4461-4472.

795 Chassot, A.A., Ranc, F., Gregoire, E.P., Roepers-Gajadien, H.L., Taketo, M.M., Camerino, G., de  
796 Rooij, D.G., Schedl, A., Chaboissier, M.C., 2008. Activation of beta-catenin signaling by Rspo1  
797 controls differentiation of the mammalian ovary. *Hum Mol Genet* 17, 1264-1277.  
798 Chawengsaksophak, K., Svingen, T., Ng, E.T., Epp, T., Spiller, C.M., Clark, C., Cooper, H.,  
799 Koopman, P., 2012. Loss of Wnt5a disrupts primordial germ cell migration and male sexual  
800 development in mice. *Biology of reproduction* 86, 1-12.  
801 Ciau-Uitz, A., Wang, L., Patient, R., Liu, F., 2013. ETS transcription factors in hematopoietic  
802 stem cell development. *Blood Cells Mol Dis* 51, 248-255.  
803 Colvin, J.S., Green, R.P., Schmahl, J., Capel, B., Ornitz, D.M., 2001. Male-to-female sex reversal in  
804 mice lacking fibroblast growth factor 9. *Cell* 104, 875-889.  
805 Combes, A.N., Wilhelm, D., Davidson, T., Dejana, E., Harley, V., Sinclair, A., Koopman, P., 2009.  
806 Endothelial cell migration directs testis cord formation. *Dev Biol* 326, 112-120.  
807 Coveney, D., Cool, J., Oliver, T., Capel, B., 2008. Four-dimensional analysis of vascularization  
808 during primary development of an organ, the gonad. *Proc Natl Acad Sci U S A* 105, 7212-7217.  
809 Creighton, M.P., Cheng, A.W., Welstead, G.G., Kooistra, T., Carey, B.W., Steine, E.J., Hanna, J.,  
810 Lodato, M.A., Frampton, G.M., Sharp, P.A., Boyer, L.A., Young, R.A., Jaenisch, R., 2010. Histone  
811 H3K27ac separates active from poised enhancers and predicts developmental state. *Proc Natl*  
812 *Acad Sci U S A* 107, 21931-21936.  
813 Dallosso, A.R., Hancock, A.L., Malik, S., Salpekar, A., King-Underwood, L., Pritchard-Jones, K.,  
814 Peters, J., Moorwood, K., Ward, A., Malik, K.T., Brown, K.W., 2007. Alternately spliced WT1  
815 antisense transcripts interact with WT1 sense RNA and show epigenetic and splicing defects  
816 in cancer. *RNA* 13, 2287-2299.  
817 Feng, J., Liu, T., Qin, B., Zhang, Y., Liu, X.S., 2012. Identifying ChIP-seq enrichment using MACS.  
818 *Nat Protoc* 7, 1728-1740.  
819 Fleischman, R.A., 1993. From white spots to stem cells: the role of the Kit receptor in  
820 mammalian development. *Trends in genetics : TIG* 9, 285-290.  
821 Garcia, T.X., Farmaha, J.K., Kow, S., Hofmann, M.C., 2014. RBPJ in mouse Sertoli cells is  
822 required for proper regulation of the testis stem cell niche. *Development* 141, 4468-4478.  
823 Gaspar, J., Thai, S., Volland, C., Dube, A., Libermann, T.A., Iruela-Arispe, M.L., Oettgen, P., 2002.  
824 Opposing functions of the Ets factors NERF and ELF-1 during chicken blood vessel  
825 development. *Arterioscler Thromb Vasc Biol* 22, 1106-1112.  
826 Gonen, N., Quinn, A., O'Neill, H.C., Koopman, P., Lovell-Badge, R., 2017. Normal Levels of Sox9  
827 Expression in the Developing Mouse Testis Depend on the TES/TESCO Enhancer, but This  
828 Does Not Act Alone. *PLoS Genet* 13, e1006520.  
829 Guenther, M.G., Levine, S.S., Boyer, L.A., Jaenisch, R., Young, R.A., 2007. A chromatin landmark  
830 and transcription initiation at most promoters in human cells. *Cell* 130, 77-88.  
831 Gustin, S.E., Stringer, J.M., Hogg, K., Sinclair, A.H., Western, P.S., 2016. FGF9, activin and  
832 TGFbeta promote testicular characteristics in an XX gonad organ culture model. *Reproduction*  
833 152, 529-543.  
834 Hammes, A., Guo, J.K., Lutsch, G., Leheste, J.R., Landrock, D., Ziegler, U., Gubler, M.C., Schedl, A.,  
835 2001. Two splice variants of the Wilms' tumor 1 gene have distinct functions during sex  
836 determination and nephron formation. *Cell* 106, 319-329.  
837 Hawkins, R.D., Hon, G.C., Lee, L.K., Ngo, Q., Lister, R., Pelizzola, M., Edsall, L.E., Kuan, S., Luu, Y.,  
838 Klugman, S., Antosiewicz-Bourget, J., Ye, Z., Espinoza, C., Agarwahl, S., Shen, L., Ruotti, V., Wang,  
839 W., Stewart, R., Thomson, J.A., Ecker, J.R., Ren, B., 2010. Distinct epigenomic landscapes of  
840 pluripotent and lineage-committed human cells. *Cell Stem Cell* 6, 479-491.  
841 Heinz, S., Benner, C., Spann, N., Bertolino, E., Lin, Y.C., Laslo, P., Cheng, J.X., Murre, C., Singh, H.,  
842 Glass, C.K., 2010. Simple combinations of lineage-determining transcription factors prime cis-  
843 regulatory elements required for macrophage and B cell identities. *Mol Cell* 38, 576-589.

Herrada, G., Wolgemuth, D.J., 1997. The mouse transcription factor Stat4 is expressed in haploid male germ cells and is present in the perinuclear theca of spermatozoa. *J Cell Sci* 110 ( Pt 14), 1543-1553.

Huang, X., Brown, C., Ni, W., Maynard, E., Rigby, A.C., Oettgen, P., 2006. Critical role for the Ets transcription factor ELF-1 in the development of tumor angiogenesis. *Blood* 107, 3153-3160.

Ishaq, M., Schang, A.L., Magre, S., Laverriere, J.N., Guillou, A., Coudouel, N., Wargnier, R., Cohen-Tannoudji, J., Counis, R., 2013. Rat Gnrhr promoter directs species-specific gene expression in the pituitary and testes of transgenic mice. *J Mol Endocrinol* 50, 411-426.

Jameson, S.A., Natarajan, A., Cool, J., DeFalco, T., Maatouk, D.M., Mork, L., Munger, S.C., Capel, B., 2012. Temporal transcriptional profiling of somatic and germ cells reveals biased lineage priming of sexual fate in the fetal mouse gonad. *PLoS Genet* 8, e1002575.

Josso, N., di Clemente, N., 1999. TGF-beta Family Members and Gonadal Development. *Trends in endocrinology and metabolism: TEM* 10, 216-222.

Julio-Pieper, M., Flor, P.J., Dinan, T.G., Cryan, J.F., 2011. Exciting times beyond the brain: metabotropic glutamate receptors in peripheral and non-neural tissues. *Pharmacol Rev* 63, 35-58.

Karl, J., Capel, B., 1998. Sertoli cells of the mouse testis originate from the coelomic epithelium. *Dev Biol* 203, 323-333.

Katoh-Fukui, Y., Miyabayashi, K., Komatsu, T., Owaki, A., Baba, T., Shima, Y., Kidokoro, T., Kanai, Y., Schedl, A., Wilhelm, D., Koopman, P., Okuno, Y., Morohashi, K., 2012. Cbx2, a polycomb group gene, is required for Sry gene expression in mice. *Endocrinology* 153, 913-924.

Katoh-Fukui, Y., Owaki, A., Toyama, Y., Kusaka, M., Shinohara, Y., Maekawa, M., Toshimori, K., Morohashi, K., 2005. Mouse Polycomb M33 is required for splenic vascular and adrenal gland formation through regulating Ad4BP/SF1 expression. *Blood* 106, 1612-1620.

Kent, J., Wheatley, S.C., Andrews, J.E., Sinclair, A.H., Koopman, P., 1996. A male-specific role for SOX9 in vertebrate sex determination. *Development* 122, 2813-2822.

Kim, Y., Kobayashi, A., Sekido, R., DiNapoli, L., Brennan, J., Chaboissier, M.C., Poulat, F., Behringer, R.R., Lovell-Badge, R., Capel, B., 2006. Fgf9 and Wnt4 act as antagonistic signals to regulate mammalian sex determination. *PLoS biology* 4, e187.

Kulkarni, R.M., Greenberg, J.M., Akeson, A.L., 2009. NFATc1 regulates lymphatic endothelial development. *Mech Dev* 126, 350-365.

Kuroki, S., Okashita, N., Baba, S., Maeda, R., Miyawaki, S., Yano, M., Yamaguchi, M., Kitano, S., Miyachi, H., Itoh, A., Yoshida, M., Tachibana, M., 2017. Rescuing the aberrant sex development of H3K9 demethylase Jmjd1a-deficient mice by modulating H3K9 methylation balance. *PLoS Genet* 13, e1007034.

Lee, B.K., Shen, W., Lee, J., Rhee, C., Chung, H., Kim, K.Y., Park, I.H., Kim, J., 2015. Tgif1 Counterbalances the Activity of Core Pluripotency Factors in Mouse Embryonic Stem Cells. *Cell Rep* 13, 52-60.

Liu, X., Zhao, D., James, L., Li, J., Zeng, H., 2011. Requirement of the nuclear localization of transcription enhancer factor 3 for proliferation, migration, tube formation, and angiogenesis induced by vascular endothelial growth factor. *Faseb J* 25, 1188-1197.

Liu, Z., Castrillon, D.H., Zhou, W., Richards, J.S., 2013. FOXO1/3 depletion in granulosa cells alters follicle growth, death and regulation of pituitary FSH. *Mol Endocrinol* 27, 238-252.

Luo, X., Ikeda, Y., Parker, K.L., 1994. A cell-specific nuclear receptor is essential for adrenal and gonadal development and sexual differentiation. *Cell* 77, 481-490.

Maatouk, D.M., Natarajan, A., Shibata, Y., Song, L., Crawford, G.E., Ohler, U., Capel, B., 2017. Genome-wide identification of regulatory elements in Sertoli cells. *Development* 144, 720-730.

891 Marciniak, M., Chruscicka, B., Lech, T., Burnat, G., Pilc, A., 2016. Expression of group III  
892 metabotropic glutamate receptors in the reproductive system of male mice. *Reproduction,*  
893 *fertility, and development* 28, 369-374.

894 Matson, C.K., Murphy, M.W., Sarver, A.L., Griswold, M.D., Bardwell, V.J., Zarkower, D., 2011.  
895 DMRT1 prevents female reprogramming in the postnatal mammalian testis. *Nature* 476, 101-  
896 104.

897 McLean, C.Y., Bristor, D., Hiller, M., Clarke, S.L., Schaar, B.T., Lowe, C.B., Wenger, A.M., Bejerano,  
898 G., 2010. GREAT improves functional interpretation of cis-regulatory regions. *Nat Biotechnol*  
899 28, 495-501.

900 Meng, Z.Z., Liu, W., Xia, Y., Yin, H.M., Zhang, C.Y., Su, D., Yan, L.F., Gu, A.H., Zhou, Y., 2017. The  
901 pro-inflammatory signalling regulator Stat4 promotes vasculogenesis of great vessels derived  
902 from endothelial precursors. *Nat Commun* 8, 14640.

903 Mericskay, M., Kitajewski, J., Sassoon, D., 2004. Wnt5a is required for proper epithelial-  
904 mesenchymal interactions in the uterus. *Development* 131, 2061-2072.

905 Messina, A., Ferraris, N., Wray, S., Cagnoni, G., Donohue, D.E., Casoni, F., Kramer, P.R., Derijck,  
906 A.A., Adolfs, Y., Fasolo, A., Pasterkamp, R.J., Giacobini, P., 2011. Dysregulation of  
907 Semaphorin7A/beta1-integrin signaling leads to defective GnRH-1 cell migration, abnormal  
908 gonadal development and altered fertility. *Hum Mol Genet* 20, 4759-4774.

909 Mi, H., Dong, Q., Muruganujan, A., Gaudet, P., Lewis, S., Thomas, P.D., 2010. PANTHER version  
910 7: improved phylogenetic trees, orthologs and collaboration with the Gene Ontology  
911 Consortium. *Nucleic Acids Res* 38, D204-210.

912 Mikkelsen, T.S., Ku, M., Jaffe, D.B., Issac, B., Lieberman, E., Giannoukos, G., Alvarez, P.,  
913 Brockman, W., Kim, T.K., Koche, R.P., Lee, W., Mendenhall, E., O'Donovan, A., Presser, A., Russ,  
914 C., Xie, X., Meissner, A., Wernig, M., Jaenisch, R., Nusbaum, C., Lander, E.S., Bernstein, B.E., 2007.  
915 Genome-wide maps of chromatin state in pluripotent and lineage-committed cells. *Nature*  
916 448, 553-560.

917 Mithraprabhu, S., Loveland, K.L., 2009. Control of KIT signalling in male germ cells: what can  
918 we learn from other systems? *Reproduction* 138, 743-757.

919 Molyneaux, K.A., Stallock, J., Schaible, K., Wylie, C., 2001. Time-lapse analysis of living mouse  
920 germ cell migration. *Dev Biol* 240, 488-498.

921 Mork, L., Maatouk, D.M., McMahon, J.A., Guo, J.J., Zhang, P., McMahon, A.P., Capel, B., 2012.  
922 Temporal differences in granulosa cell specification in the ovary reflect distinct follicle fates in  
923 mice. *Biology of reproduction* 86, 37.

924 Mukoyama, Y., Chiba, N., Mucenski, M.L., Satake, M., Miyajima, A., Hara, T., Watanabe, T., 1999.  
925 Hematopoietic cells in cultures of the murine embryonic aorta-gonad-mesonephros region  
926 are induced by c-Myb. *Current biology : CB* 9, 833-836.

927 Munsterberg, A., Lovell-Badge, R., 1991. Expression of the mouse anti-mullerian hormone  
928 gene suggests a role in both male and female sexual differentiation. *Development* 113, 613-  
929 624.

930 Nakata, Y., Shetzline, S., Sakashita, C., Kalota, A., Rallapalli, R., Rudnick, S.I., Zhang, Y., Emerson,  
931 S.G., Gewirtz, A.M., 2007. c-Myb contributes to G2/M cell cycle transition in human  
932 hematopoietic cells by direct regulation of cyclin B1 expression. *Mol Cell Biol* 27, 2048-2058.

933 Ng, J.H., Kumar, V., Muratani, M., Kraus, P., Yeo, J.C., Yaw, L.P., Xue, K., Lufkin, T., Prabhakar, S.,  
934 Ng, H.H., 2013. In vivo epigenomic profiling of germ cells reveals germ cell molecular  
935 signatures. *Dev Cell* 24, 324-333.

936 Ottolenghi, C., Pelosi, E., Tran, J., Colombino, M., Douglass, E., Nedorezov, T., Cao, A., Forabosco,  
937 A., Schlessinger, D., 2007. Loss of Wnt4 and Foxl2 leads to female-to-male sex reversal  
938 extending to germ cells. *Hum Mol Genet* 16, 2795-2804.



Pannetier, M., Chassot, A.A., Chaboissier, M.C., Pailhoux, E., 2016. Involvement of FOXL2 and RSP01 in Ovarian Determination, Development, and Maintenance in Mammals. *Sex Dev* 10, 167-184.

Parker, J., Klein, S.L., McClintock, M.K., Morison, W.L., Ye, X., Conti, C.J., Peterson, N., Nousari, C.H., Tausk, F.A., 2004. Chronic stress accelerates ultraviolet-induced cutaneous carcinogenesis. *J Am Acad Dermatol* 51, 919-922.

Ramirez, F., Dundar, F., Diehl, S., Gruning, B.A., Manke, T., 2014. deepTools: a flexible platform for exploring deep-sequencing data. *Nucleic Acids Res* 42, W187-191.

Remy, P., Baltzinger, M., 2000. The Ets-transcription factor family in embryonic development: lessons from the amphibian and bird. *Oncogene* 19, 6417-6431.

Sachs, M., Onodera, C., Blaschke, K., Ebata, K.T., Song, J.S., Ramalho-Santos, M., 2013. Bivalent chromatin marks developmental regulatory genes in the mouse embryonic germline in vivo. *Cell Rep* 3, 1777-1784.

Sakai, N., Terami, H., Suzuki, S., Haga, M., Nomoto, K., Tsuchida, N., Morohashi, K., Saito, N., Asada, M., Hashimoto, M., Harada, D., Asahara, H., Ishikawa, T., Shimada, F., Sakurada, K., 2008. Identification of NR5A1 (SF-1/AD4BP) gene expression modulators by large-scale gain and loss of function studies. *J Endocrinol* 198, 489-497.

Santos-Rosa, H., Schneider, R., Bannister, A.J., Sherriff, J., Bernstein, B.E., Emre, N.C., Schreiber, S.L., Mellor, J., Kouzarides, T., 2002. Active genes are tri-methylated at K4 of histone H3. *Nature* 419, 407-411.

Schang, A.L., Querat, B., Simon, V., Garrel, G., Bleux, C., Counis, R., Cohen-Tannoudji, J., Laverriere, J.N., 2012. Mechanisms underlying the tissue-specific and regulated activity of the Gnrhr promoter in mammals. *Front Endocrinol (Lausanne)* 3, 162.

Schmidt, D., Ovitt, C.E., Anlag, K., Fehsenfeld, S., Gredsted, L., Treier, A.C., Treier, M., 2004. The murine winged-helix transcription factor Foxl2 is required for granulosa cell differentiation and ovary maintenance. *Development* 131, 933-942.

Sekido, R., Lovell-Badge, R., 2008. Sex determination involves synergistic action of SRY and SF1 on a specific Sox9 enhancer. *Nature* 453, 930-934.

Shin, H., Liu, T., Manrai, A.K., Liu, X.S., 2009. CEAS: cis-regulatory element annotation system. *Bioinformatics* 25, 2605-2606.

Spiller, C., Koopman, P., Bowles, J., 2017. Sex Determination in the Mammalian Germline. *Annu Rev Genet*.

Supek, F., Bosnjak, M., Skunca, N., Smuc, T., 2011. REVIGO summarizes and visualizes long lists of gene ontology terms. *PLoS One* 6, e21800.

Tanaka, S.S., Nishinakamura, R., 2014. Regulation of male sex determination: genital ridge formation and Sry activation in mice. *Cell Mol Life Sci* 71, 4781-4802.

Theunissen, T.W., van Oosten, A.L., Castelo-Branco, G., Hall, J., Smith, A., Silva, J.C., 2011. Nanog overcomes reprogramming barriers and induces pluripotency in minimal conditions. *Current biology : CB* 21, 65-71.

Uhlenhaut, N.H., Jakob, S., Anlag, K., Eisenberger, T., Sekido, R., Kress, J., Treier, A.C., Klugmann, C., Klasen, C., Holter, N.I., Riethmacher, D., Schutz, G., Cooney, A.J., Lovell-Badge, R., Treier, M., 2009. Somatic sex reprogramming of adult ovaries to testes by FOXL2 ablation. *Cell* 139, 1130-1142.

Vainio, S., Heikkila, M., Kispert, A., Chin, N., McMahon, A.P., 1999. Female development in mammals is regulated by Wnt-4 signalling. *Nature* 397, 405-409.

Vilain, E., 2011. The genetics of ovotesticular disorders of sex development. *Adv Exp Med Biol* 707, 105-106.

Voigt, P., Tee, W.W., Reinberg, D., 2013. A double take on bivalent promoters. *Genes Dev* 27, 1318-1338.

988 Wen, S., Ai, W., Alim, Z., Boehm, U., 2010. Embryonic gonadotropin-releasing hormone  
989 signaling is necessary for maturation of the male reproductive axis. *Proc Natl Acad Sci U S A*  
990 107, 16372-16377.

991 Wilhelm, D., Hiramatsu, R., Mizusaki, H., Widjaja, L., Combes, A.N., Kanai, Y., Koopman, P., 2007.  
992 SOX9 regulates prostaglandin D synthase gene transcription in vivo to ensure testis  
993 development. *J Biol Chem* 282, 10553-10560.

994 Wilhelm, D., Huang, E., Svingen, T., Stanfield, S., Dinnis, D., Koopman, P., 2006. Comparative  
995 proteomic analysis to study molecular events during gonad development in mice. *Genesis* 44,  
996 168-176.

997 Wilson, M.J., Jeyasuria, P., Parker, K.L., Koopman, P., 2005. The transcription factors  
998 steroidogenic factor-1 and SOX9 regulate expression of Vanin-1 during mouse testis  
999 development. *J Biol Chem* 280, 5917-5923.

1000 Wotton, D., Lo, R.S., Lee, S., Massague, J., 1999. A Smad transcriptional corepressor. *Cell* 97, 29-  
1001 39.

1002 Wu, B., Wang, Y., Lui, W., Langworthy, M., Tompkins, K.L., Hatzopoulos, A.K., Baldwin, H.S.,  
1003 Zhou, B., 2011. Nfatc1 coordinates valve endocardial cell lineage development required for  
1004 heart valve formation. *Circ Res* 109, 183-192.

1005 Xu, X., Coats, J.K., Yang, C.F., Wang, A., Ahmed, O.M., Alvarado, M., Izumi, T., Shah, N.M., 2012.  
1006 Modular genetic control of sexually dimorphic behaviors. *Cell* 148, 596-607.

1007 Yamaguchi, S., Kurimoto, K., Yabuta, Y., Sasaki, H., Nakatsuji, N., Saitou, M., Tada, T., 2009.  
1008 Conditional knockdown of Nanog induces apoptotic cell death in mouse migrating primordial  
1009 germ cells. *Development* 136, 4011-4020.

1010 Yamamizu, K., Piao, Y., Sharov, A.A., Zsiros, V., Yu, H., Nakazawa, K., Schlessinger, D., Ko, M.S.,  
1011 2013. Identification of transcription factors for lineage-specific ESC differentiation. *Stem Cell*  
1012 *Reports* 1, 545-559.

1013 Yang, Y., Wilson, M.J., 2015. Lhx9 gene expression during early limb development in mice  
1014 requires the FGF signalling pathway. *Gene Expr Patterns* 19, 45-51.

1015 Young, M.D., Willson, T.A., Wakefield, M.J., Trounson, E., Hilton, D.J., Blewitt, M.E., Oshlack, A.,  
1016 Majewski, I.J., 2011. ChIP-seq analysis reveals distinct H3K27me3 profiles that correlate with  
1017 transcriptional activity. *Nucleic Acids Res* 39, 7415-7427.

1018 Zhang, X., Yalcin, S., Lee, D.F., Yeh, T.Y., Lee, S.M., Su, J., Mungamuri, S.K., Rimmele, P., Kennedy,  
1019 M., Sellers, R., Landthaler, M., Tuschl, T., Chi, N.W., Lemischka, I., Keller, G., Ghaffari, S., 2011.  
1020 FOXO1 is an essential regulator of pluripotency in human embryonic stem cells. *Nat Cell Biol*  
1021 13, 1092-1099.

1022 Zheng, L.P., Huang, J., Zhang, D.L., Xu, L.Q., Li, F., Wu, L., Liu, Z.Y., Zheng, Y.H., 2012. c-erbB2 and  
1023 c-myc induce mouse oocyte maturation involving activation of maturation promoting factor.  
1024 *DNA Cell Biol* 31, 164-170.

1025
